# Supplementary material for: Negative regulation of APC/C activation by MAPK-mediated attenuation of Cdc20Slp1 under stress
Source: eLife journal article supplement (doi:10.7554/elife.97896), 2024-06-25

Figure 1-figure supplement 2A

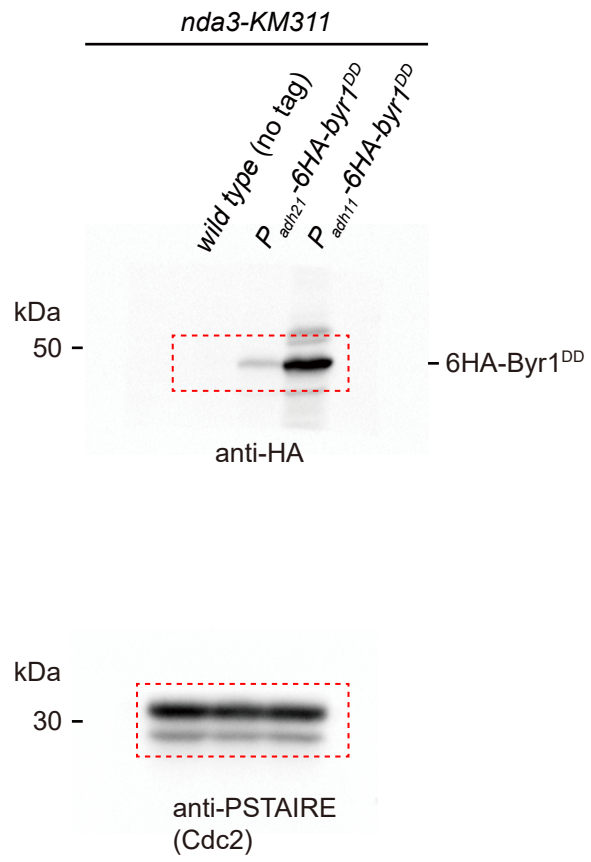

Supplement: fig1-figsupp2-data1 [file elife-97896-fig1-figsupp2-data1-v1.pdf]
