# Supplementary material for: Negative regulation of APC/C activation by MAPK-mediated attenuation of Cdc20Slp1 under stress
Source: eLife journal article supplement (doi:10.7554/elife.97896), 2024-06-25

Figure 4A.

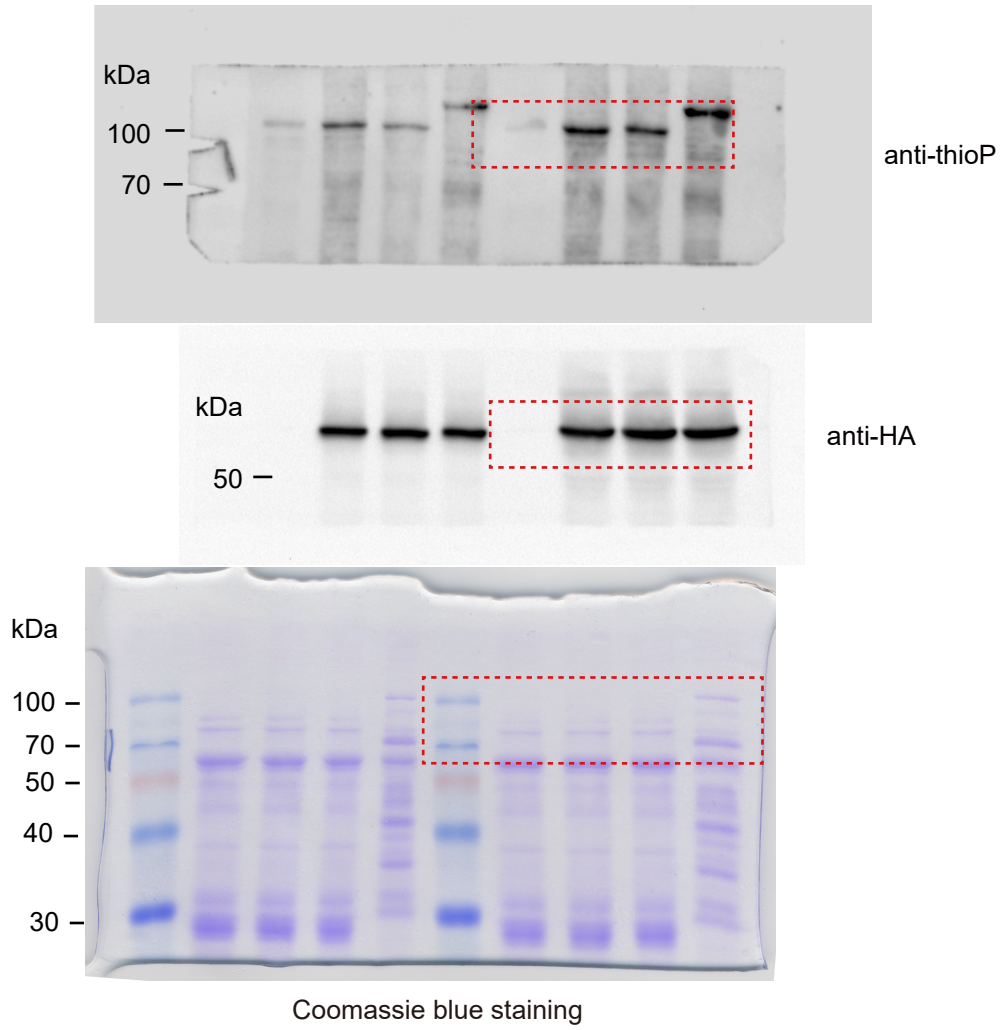

Figure 4C. *in vitro* kinase assay

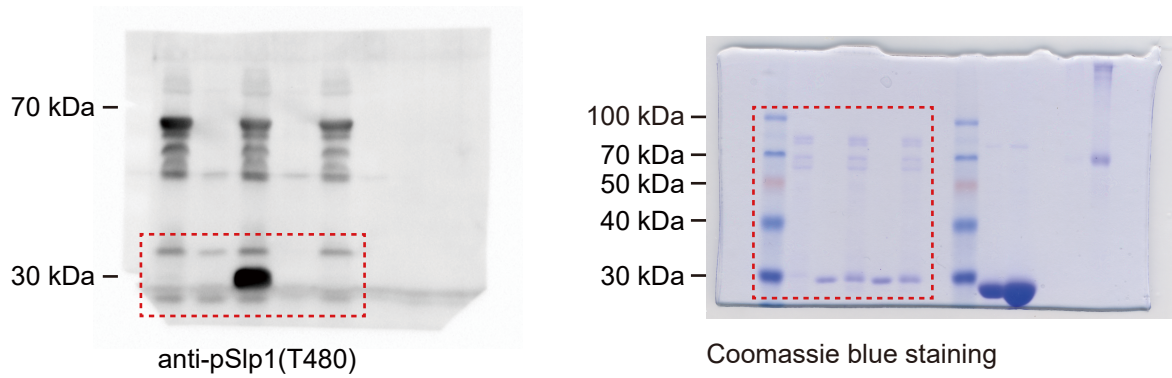

Figure 4D.

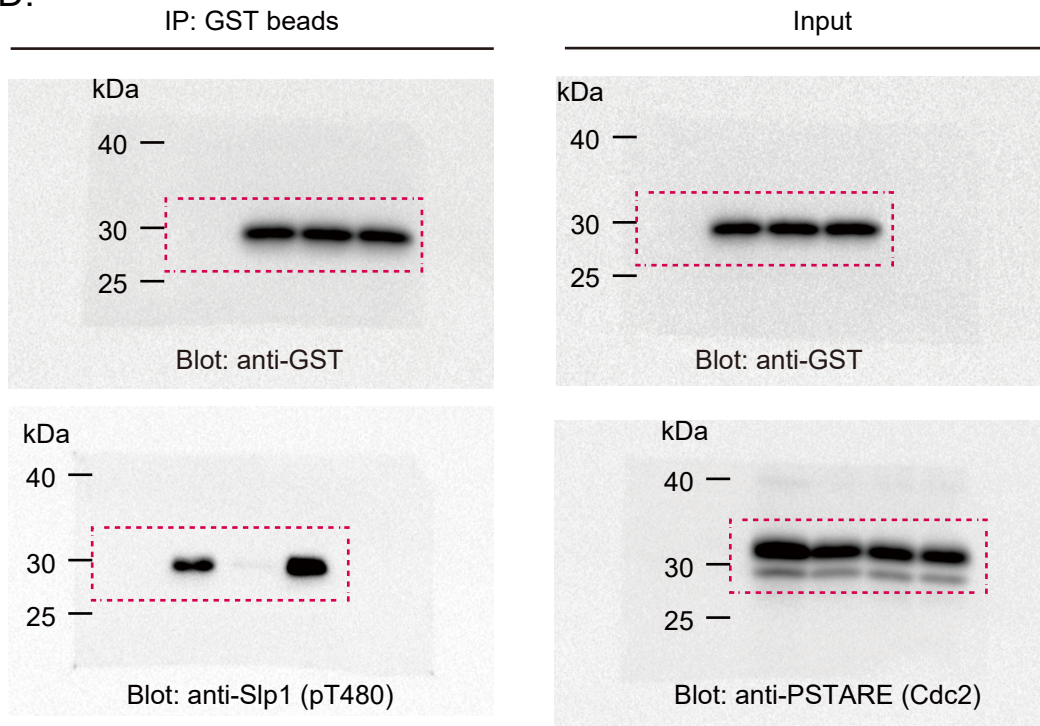

Figure 4E.

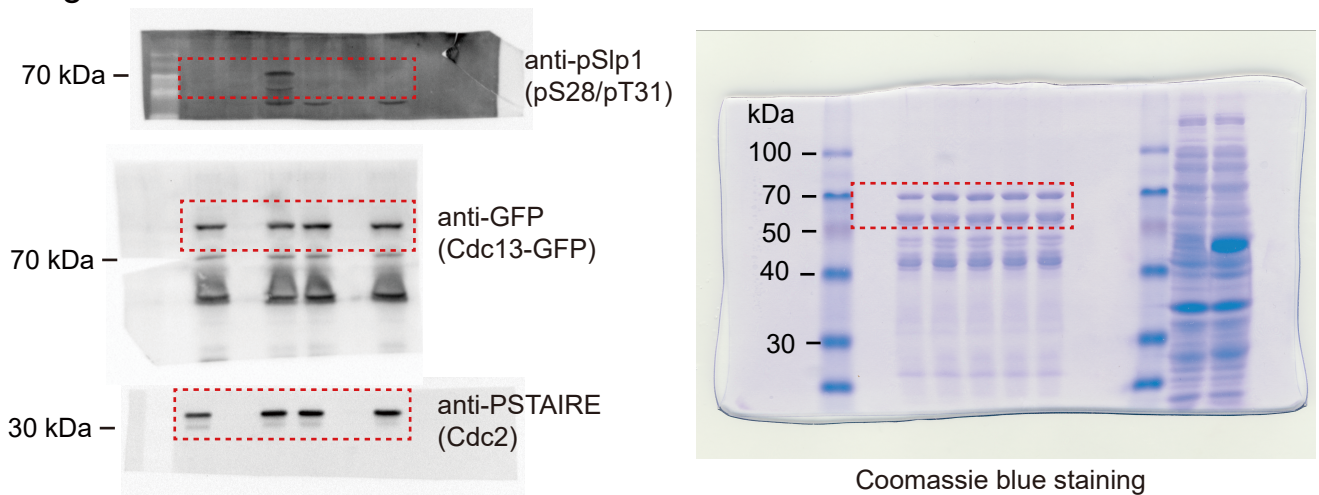

Figure 4F.

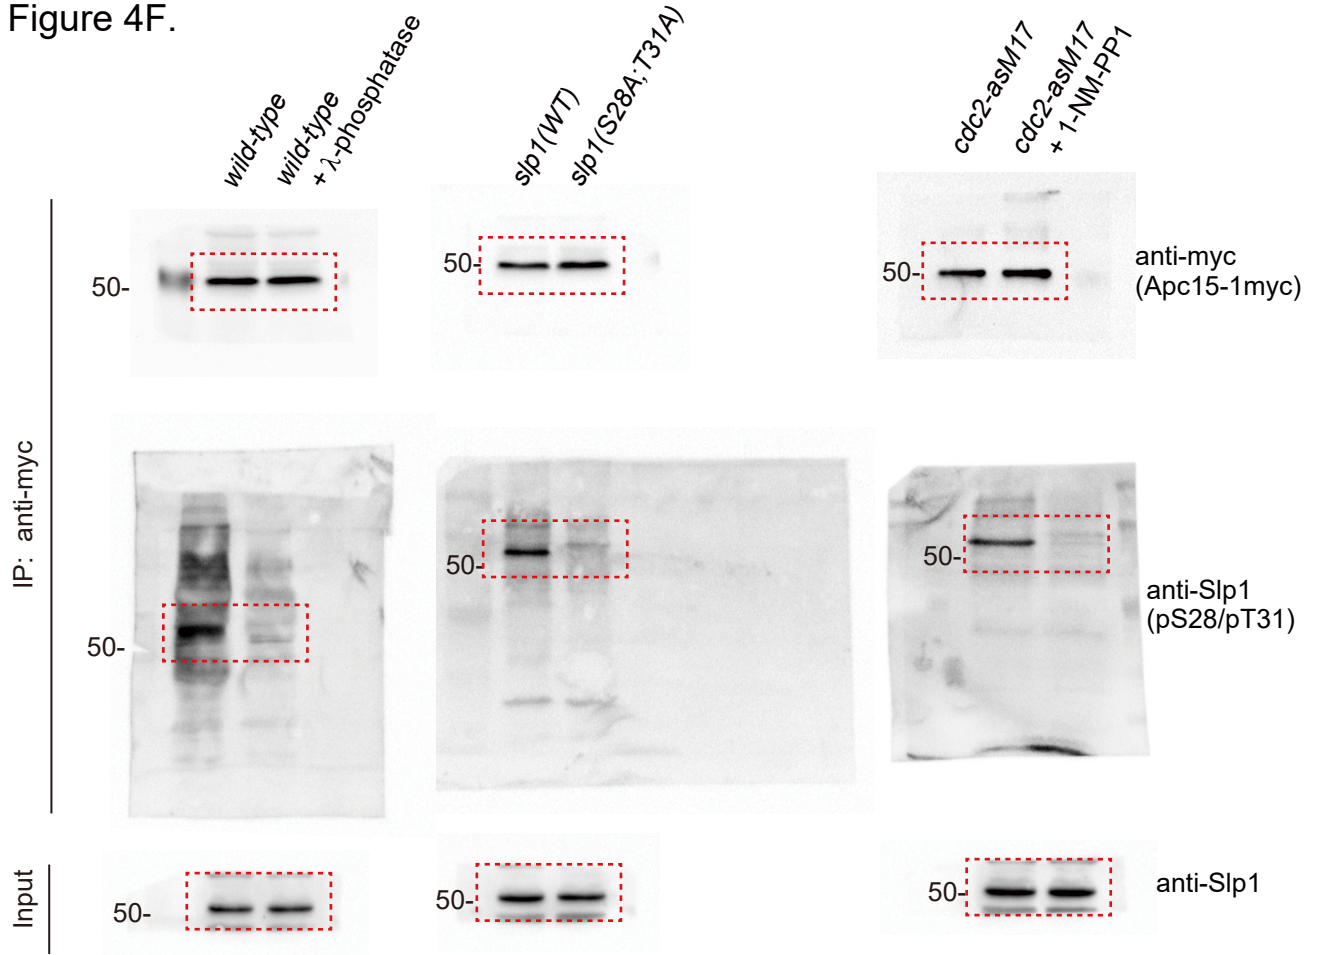

Figure 4G.

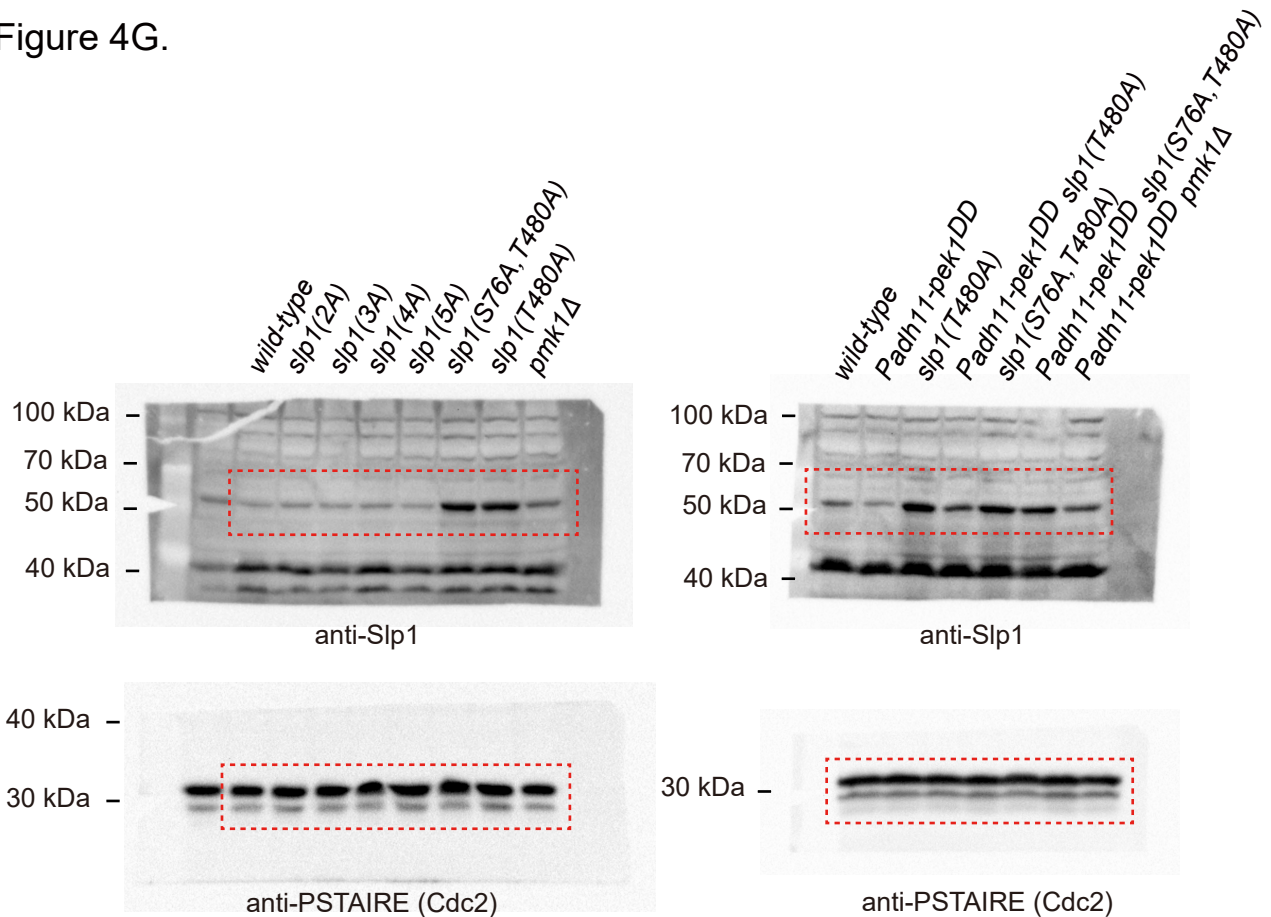

Supplement: fig4-data1 [file elife-97896-fig4-data1-v1.pdf]
