# Supplementary material for: Negative regulation of APC/C activation by MAPK-mediated attenuation of Cdc20Slp1 under stress
Source: eLife journal article supplement (doi:10.7554/elife.97896), 2024-06-25

Figure 5A.

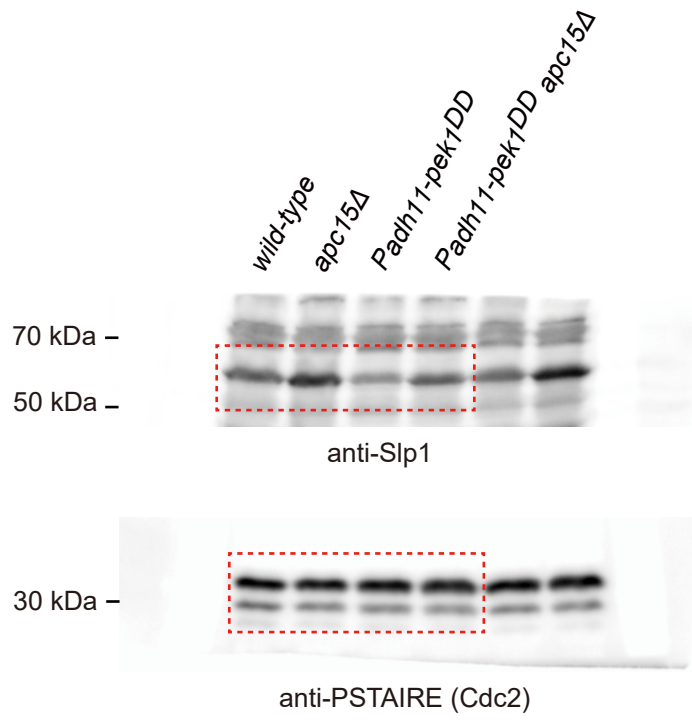

Figure 5C.

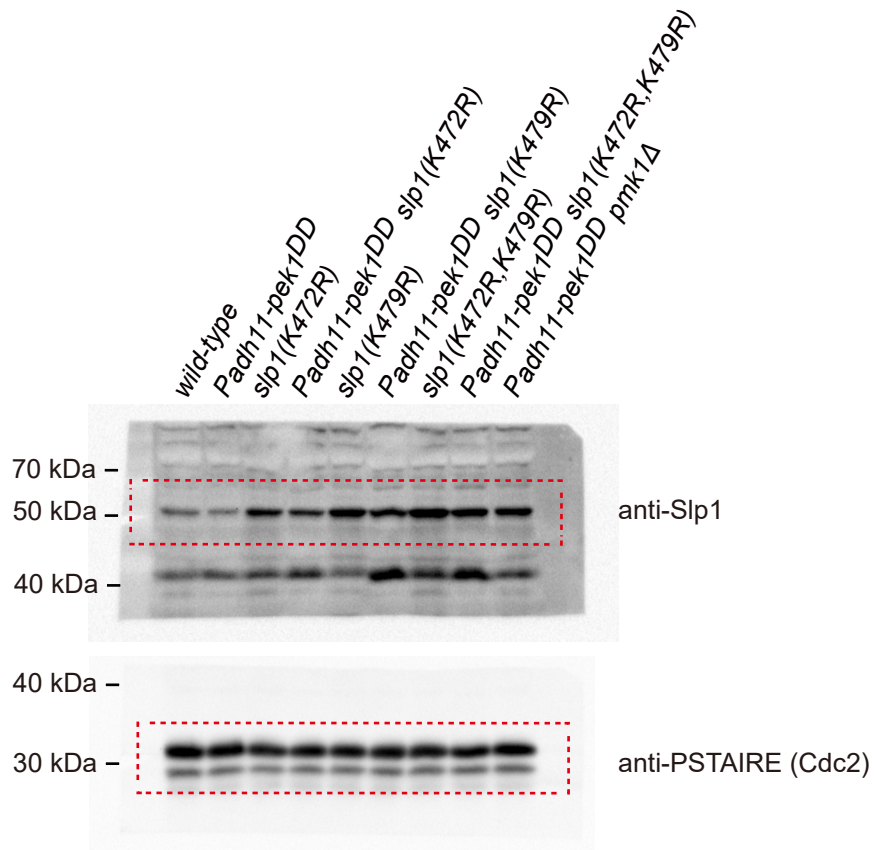

Figure 5F.

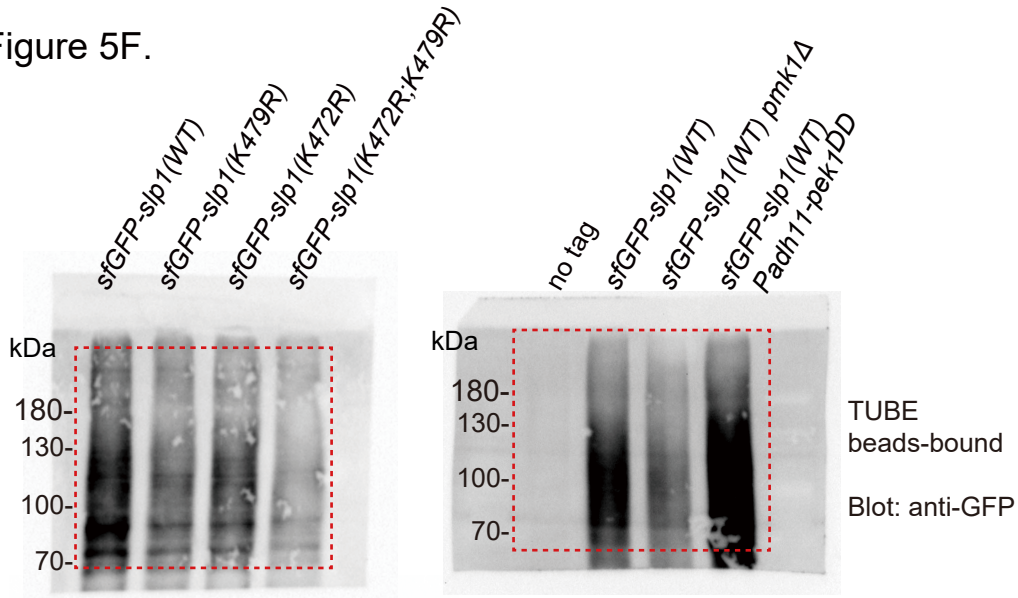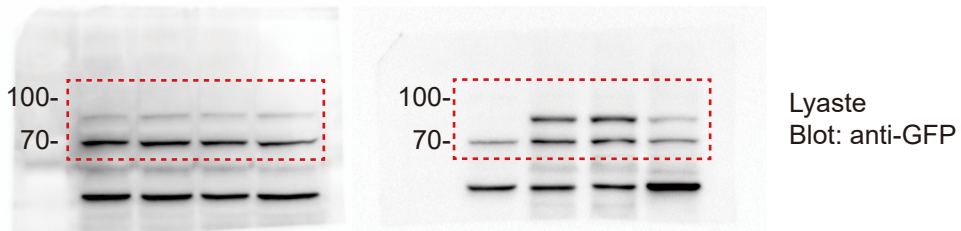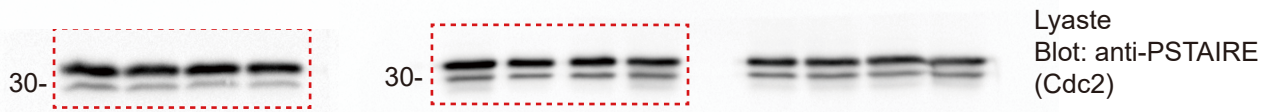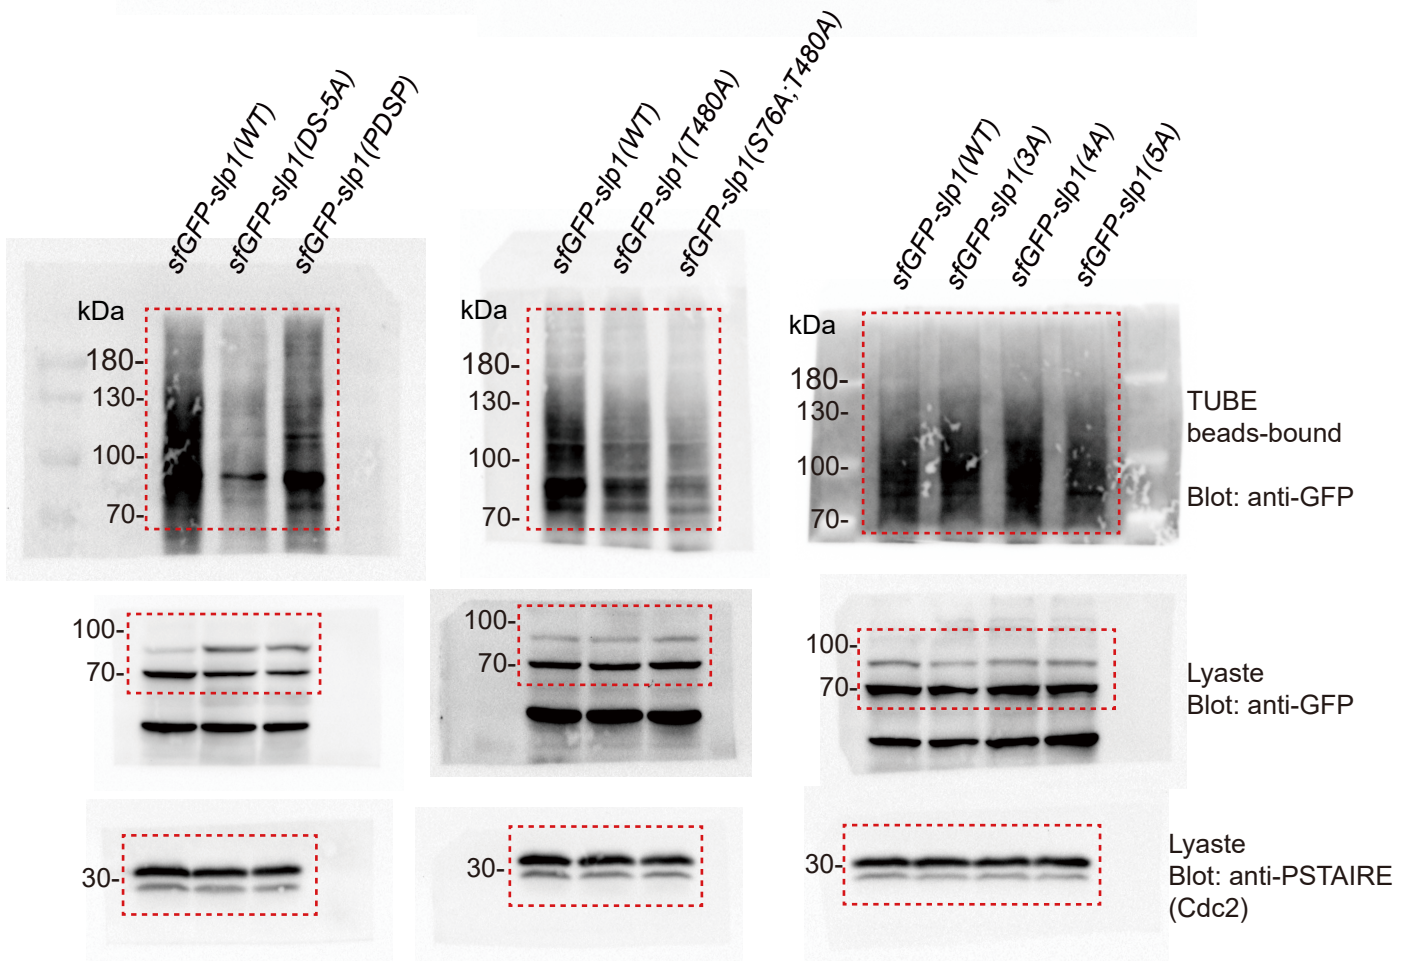

Supplement: fig5-data1 [file elife-97896-fig5-data1-v1.pdf]
