# Supplementary material for: Negative regulation of APC/C activation by MAPK-mediated attenuation of Cdc20Slp1 under stress
Source: eLife journal article supplement (doi:10.7554/elife.97896), 2024-06-25

# Figure 6-figure supplement 1

|                                          |   |   |   |   |
|------------------------------------------|---|---|---|---|
| KCl                                      | - | + | - | - |
| <i>P<sub>nmt1</sub>-mad2<sup>+</sup></i> | - | - | + | + |
| Thiamine                                 | - | - | + | - |

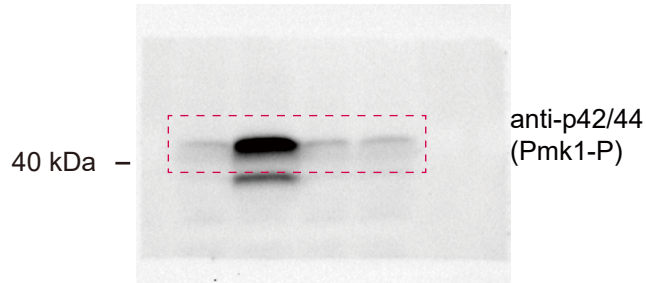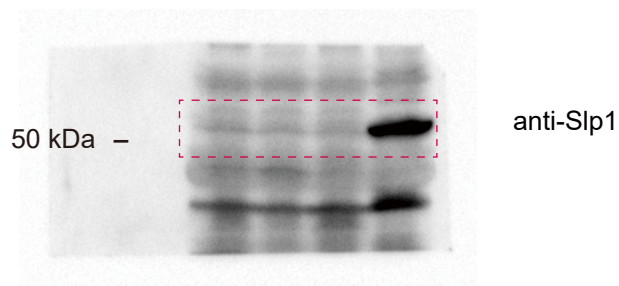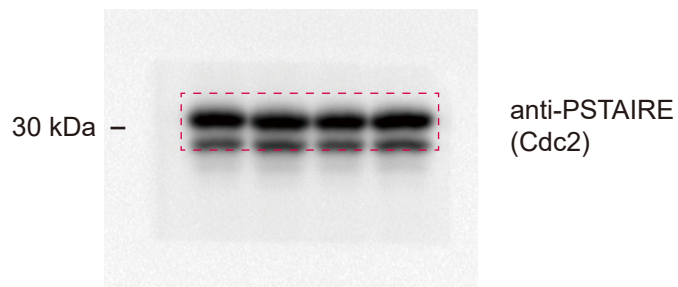

Supplement: fig6-figsupp1-data1 [file elife-97896-fig6-figsupp1-data1-v1.pdf]
