# Supplementary material for: Negative regulation of APC/C activation by MAPK-mediated attenuation of Cdc20Slp1 under stress
Source: eLife journal article supplement (doi:10.7554/elife.97896), 2024-06-25
Supplement: fig6-figsupp3-data3 [file elife-97896-fig6-figsupp3-data3-v1.zip]

Figure 6-figure supplement 3-Source Data 2. Raw data of Slp1 level measurement for Figure 6-figure supplement 3.

Figure 6-figure supplement 3-Source Data 3. Full raw unedited blot (phosphorylated Sty1, KCl-treated group) for Figure 6-figure supplement 3.

Figure 6-figure supplement 3-Source Data 4. Full raw unedited blot (phosphorylated Pmk1, KCl-treated group) for Figure 6-figure supplement.

Figure 6-figure supplement 3-Source Data 5. Full raw unedited blot (Slp1, 2027 KCl-treated group) for Figure 6-figure supplement 3.

Figure 6-figure supplement 3-Source Data 6. Full raw unedited blot (Cdc2, 2029 KCl-treated group) for Figure 6-figure supplement 3.

Figure 6-figure supplement 3-Source Data 7. Full raw unedited blot (phosphorylated Sty1, Caspofungin-treated group) for Figure 6-figure supplement 3.

Figure 6-figure supplement 3-Source Data 8. Full raw unedited blot(phosphorylated Pmk1, Caspofungin-treated group) for Figure 6-figure supplement 3.

Figure 6-figure supplement 3-Source Data 9. Full raw unedited blot (Slp1, Caspofungin-treated group) for Figure 6-figure supplement 3.

Figure 6-figure supplement 3-Source Data 10. Full raw unedited blot (Cdc2, Caspofungin-treated group) for Figure 6-figure supplement 3.
