# Supplementary material for: Negative regulation of APC/C activation by MAPK-mediated attenuation of Cdc20Slp1 under stress
Source: eLife. 2024 Oct 16;13:RP97896. doi: 10.7554/eLife.97896 (PMC11483130; doi:10.7554/eLife.97896)
Supplement: Figure 1—figure supplement 1—source data 2. [file elife-97896-fig1-figsupp1-data2.xlsx]

## Sheet: Figure 1-figure supplement 1B
	Cells with Cdc13-GFP on SPBs (%)
	Strain	timepoint (min)
	nda3-KM311	0	10	20	30	40	50
	Repeat #1	85.4545	79.8206	57.0136	41.0377	27.7551	23.2877
	Repeat #2	95.8904	92.3423	56.3786	38.0623	31.6239	18.9427
	Repeat #3	84.0637	82.1596	51.282	41.1483	27.668	17.4672
	Mean value	88.4696	84.7742	54.8914	40.0828	29.0157	19.8992
	Standard deviation (SD)	6.464	6.658	3.142	1.751	2.259	3.026
	Strain	timepoint (min)
	nda3-KM311 Padh21-pek1(DD)	0	10	20	30	40	50
	Repeat #1	92.6829	78.9916	54.5064	45.9575	40.3941	27.6699
	Repeat #2	89.5928	87.2	55.1331	41.0359	27.6859	16.8889
	Repeat #3	88.9952	83.0189	58.4677	37.9182	31.9549	30.3571
	Mean value	90.4236	83.0702	56.0358	41.6372	33.345	24.972
	Standard deviation (SD)	1.979	4.104	2.129	4.053	6.467	7.128
	Strain	timepoint (min)
	nda3-KM311 Padh21-wis1(DD)	0	10	20	30	40	50
	Repeat #1	90.2439	88.3268	75.8197	52.0492	45.4545	42.735
	Repeat #2	96.6805	95.2899	75.7322	58.0986	45.2756	37.4517
	Repeat #3	92.2179	85.6482	57.6471	53.7217	48.855	49.1039
	Mean value	93.0474	89.755	69.733	54.6232	46.5284	43.0969
	Standard deviation (SD)	3.298	4.977	10.47	3.124	2.017	5.835

## Sheet: Figure 1-figure supplement 1C
	Cells with Cdc13-GFP on SPBs (%)
	Strain	timepoint after release at 30C (min)
	nda3-KM311	0	50
	Repeat #1	85	10
	Repeat #2	92	16.5
	Repeat #3	91.5	12.5
	Mean value	89.5	13
	Standard deviation (SD)	3.905	3.279
	Strain	timepoint after release at 30C (min)
	nda3-KM311 pmk1Δ	0	50
	Repeat #1	60	18.5
	Repeat #2	45.5	21.5
	Repeat #3	54	17.5
	Repeat #4	62.5	10.5
	Mean value	55.5	17
	Standard deviation (SD)	7.561	4.655
	p value vs WT strain (nda3-KM311)	0.0009	0.2636
	Strain	timepoint after release at 30C (min)
	nda3-KM311 sty1-T97A	0	50
	Repeat #1	85	15
	Repeat #2	89	11
	Repeat #3	79.5	10
	Mean value	84.5	12
	Standard deviation (SD)	4.77	2.646
	p value vs WT strain (nda3-KM311)	0.2823	0.7021
	Strain	timepoint after release at 30C (min)
	nda3-KM311 sty1-T97A (5μM 3-BrB-PP1)	0	50
	Repeat #1	56.5	16
	Repeat #2	57	24.5
	Repeat #3	57.5	24
	Repeat #4	67	21.5
	Mean value	59.5	21.5
	Standard deviation (SD)	5.017	3.894
	p value vs WT strain (nda3-KM311)	0.0004	0.0287
	Strain	timepoint after release at 30C (min)
	nda3-KM311 spk1D	0	50
	Repeat #1	87.0504	18.6131
	Repeat #2	88.7805	15.2893
	Repeat #3	90.7258	15.1639
	Mean value	88.8522	16.3554
	Standard deviation (SD)	1.841	1.955
	p value vs WT strain (nda3-KM311)	0.8081	0.2028
	Strain	timepoint after release at 30C (min)
	nda3-KM311	0	50
	Repeat #1	85.4545	23.2877
	Repeat #2	95.8904	18.9427
	Repeat #3	84.0637	17.4672
	Mean value	88.4696	19.8992
	Standard deviation (SD)	6.464	3.026
	Strain	timepoint after release at 30C (min)
	nda3-KM311 Padh21-pek1(DD)	0	50
	Repeat #1	92.6829	27.6699
	Repeat #2	89.5928	16.8889
	Repeat #3	88.9952	30.3571
	Mean value	90.4236	24.972
	Standard deviation (SD)	1.979	7.128
	p value vs WT strain (nda3-KM311)	0.6429	0.3199
	Strain	timepoint after release at 30C (min)
	nda3-KM311 Padh11-pek1(DD)	0	50
	Repeat #1	83.8174	39.2857
	Repeat #2	87.1486	30.4348
	Repeat #3	86.7299	42.2594
	Mean value	85.8986	37.3266
	Standard deviation (SD)	1.814	6.151
	p value vs WT strain (nda3-KM311)	0.5434	0.0117
	Strain	timepoint after release at 30C (min)
	nda3-KM311 Padh21-wis1(DD)	0	50
	Repeat #1	90.2439	42.735
	Repeat #2	96.6805	37.4517
	Repeat #3	92.2179	49.1039
	Mean value	93.0474	43.0969
	Standard deviation (SD)	3.298	5.835
	p value vs WT strain (nda3-KM311)	0.3359	0.0036
	Strain	timepoint after release at 30C (min)
	nda3-KM311 Padh11-wis1(DD)	0	50
	Repeat #1	91.8699	46.0251
	Repeat #2	93.6	55.8333
	Repeat #3	88.5593	54.1063
	Mean value	91.3431	51.9882
	Standard deviation (SD)	2.561	5.236
	p value vs WT strain (nda3-KM311)	0.5137	0.0008
