# Supplementary material for: Negative regulation of APC/C activation by MAPK-mediated attenuation of Cdc20Slp1 under stress
Source: eLife. 2024 Oct 16;13:RP97896. doi: 10.7554/eLife.97896 (PMC11483130; doi:10.7554/eLife.97896)
Supplement: Figure 1—figure supplement 2—source data 2. [file elife-97896-fig1-figsupp2-data2.xlsx]

## Sheet: Figure 1-figure supplement 2C,D
		Cells with Cdc13-GFP on SPBs (%)									Cells with Cdc13-GFP on SPBs (%)
		Strain	timepoint (min)								Strain	timepoint after release at 30C (min)
		nda3-KM311	0	10	20	30	40	50			nda3-KM311	0	50
		Repeat #1	88.0184	77.6316	41.8182	30.6667	22.7273	15.0235			Repeat #1	88.0184	15.0235
		Repeat #2	86.5385	82.069	39.1304	30.2326	17.757	15.7895			Repeat #2	86.5385	15.7895
		Repeat #3	89.1439	85.1788	42.2197	32.0191	21.4348	18.531			Repeat #3	89.1439	18.531
		Mean value	87.9003	81.6265	41.0561	30.9728	20.6397	16.448			Mean value	87.9003	16.448
		Standard deviation (SD)	1.306	3.794	1.68	0.9322	2.578	1.845			Standard deviation (SD)	1.306	1.845
		Cells with Cdc13-GFP on SPBs (%)
		Strain	timepoint (min)								Strain	timepoint after release at 30C (min)
		nda3-KM311 Padh21-Byr1-DD	0	10	20	30	40	50			nda3-KM311 Padh21-Byr1-DD	0	50
		Repeat #1	89.3401	83.105	43.6364	36.0656	22.0096	20.2041			Repeat #1	89.3401	20.2041
		Repeat #2	88.5321	78.5	36.019	29.3839	22.2222	15.1042			Repeat #2	88.5321	15.1042
		Repeat #3	90.1676	83.9722	44.6904	32.1808	19.9177	17.999			Repeat #3	90.1676	17.999
		Mean value	89.3466	81.8591	41.4486	32.5434	21.3832	17.7691			Mean value	89.3466	17.7691
		Standard deviation (SD)	0.8188	2.942	4.732	3.36	1.273	2.558			Standard deviation (SD)	0.8188	2.558
											p value vs WT strain (nda3-KM311)	0.1799	0.5089
		Cells with Cdc13-GFP on SPBs (%)
		Strain	timepoint (min)								Strain	timepoint after release at 30C (min)
		nda3-KM311 Padh11-Byr1-DD	0	10	20	30	40	50			nda3-KM311 Padh11-Byr1-DD	0	50
		Repeat #1	88.1517	81.6514	36.9668	24.6512	15.4167	12.9623			Repeat #1	88.1517	12.9623
		Repeat #2	83.8428	70.0508	34.5972	24.3781	18.9573	15.3053			Repeat #2	83.8428	15.3053
		Repeat #3	87.362	79.5483	49.6947	36.975	27.2899	19.7733			Repeat #3	87.362	19.7733
		Mean value	86.4521	77.0835	40.4196	28.6681	20.5546	16.0136			Mean value	86.4521	16.0136
		Standard deviation (SD)	2.295	6.181	8.115	7.198	6.094	3.459			Standard deviation (SD)	2.295	3.459
											p value vs WT strain (nda3-KM311)	0.395	0.8574
