# Supplementary material for: Negative regulation of APC/C activation by MAPK-mediated attenuation of Cdc20Slp1 under stress
Source: eLife. 2024 Oct 16;13:RP97896. doi: 10.7554/eLife.97896 (PMC11483130; doi:10.7554/eLife.97896)
Supplement: Figure 1—figure supplement 3—source data 1. [file elife-97896-fig1-figsupp3-data1.xlsx]

## Sheet: Figure 1-figure supplement 3B
	Induction of overexpression of Mad2 for 18 hr
	Strain
	Pnmt1-mad2+	number of cells with short spindles	number of other cell type	% short spindle/metaphase arrest
	Repeat #1	199	235	84.6809
	Repeat #2	152	185	82.1622
	Repeat #3	133	155	85.8065
	Mean value			84.2165
	Standard deviation (SD)			1.866
	Strain
	Pnmt1-mad2+ pmk1Δ	number of cells with short spindles	number of other cell type	% short spindle/metaphase arrest
	Repeat #1	263	375	70.1333
	Repeat #2	137	213	64.3192
	Repeat #3	141	207	68.1159
	Mean value			67.5228
	Standard deviation (SD)			2.952
	p value vs Pnmt1-mad2+ strain			0.0012
	Strain
	Pnmt1-mad2+ sty1T97A	number of cells with short spindles	number of other cell type	% short spindle/metaphase arrest
	Repeat #1	144	232	62.069
	Repeat #2	240	338	71.0059
	Repeat #3	186	272	68.3824
	Mean value			67.1524
	Standard deviation (SD)			4.594
	p value vs Pnmt1-mad2+ strain			0.004
	Strain
	Pnmt1-mad2+ spk1Δ	number of cells with short spindles	number of other cell type	% short spindle/metaphase arrest
	Repeat #1	187	229	81.6594
	Repeat #2	172	199	86.4322
	Repeat #3	200	234	85.4701
	Mean value			84.5205
	Standard deviation (SD)			2.524
	p value vs Pnmt1-mad2+ strain			0.8749
