# Supplementary material for: Negative regulation of APC/C activation by MAPK-mediated attenuation of Cdc20Slp1 under stress
Source: eLife. 2024 Oct 16;13:RP97896. doi: 10.7554/eLife.97896 (PMC11483130; doi:10.7554/eLife.97896)
Supplement: Figure 1—source data 1. [file elife-97896-fig1-data1.xlsx]

## Sheet: Fig. 1D
	Cells with Cdc13-GFP on SPBs (%)
	Strain	timepoint (min)
	nda3-KM311	0	10	20	30	40	50
	Repeat #1	85	83.5	71	23	15.5	10
	Repeat #2	92	87.5	84	55.5	34.25	16.5
	Repeat #3	91.5	84	61	26.5	25.25	12.5
	Mean value	89.5	85	72	35	25	13
	Standard deviation (SD)	3.905	2.179	11.53	17.84	9.377	3.279
	Strain	timepoint (min)
	nda3-KM311 pmk1Δ	0	10	20	30	40	50
	Repeat #1	60	57	42.5	29.5	20	18.5
	Repeat #2	45.5	43	41	37.5	30.5	21.5
	Repeat #3	54	52	39	23	18	17.5
	Repeat #4	62.5	60	39.5	13.32	11.5	10.5
	Mean value	55.5	53	40.5	25.83	20	17
	Standard deviation (SD)	7.561	7.439	1.581	10.23	7.885	4.655
	Strain	timepoint (min)
	nda3-KM311 sty1-T97A	0	10	20	30	40	50
	Repeat #1	85	80.5	63	47.5	32	15
	Repeat #2	89	84.5	72	52	28.5	11
	Repeat #3	79.5	72	48	47.5	29.5	10
	Mean value	84.5	79	61	49	30	12
	Standard deviation (SD)	4.77	6.384	12.12	2.598	1.803	2.646
	Strain	timepoint (min)
	nda3-KM311 sty1-T97A (5μM 3-BrB-PP1)	0	10	20	30	40	50
	Repeat #1	56.5	55.5	34.5	29.5	28.5	16
	Repeat #2	57	46.25	41.875	37	31	24.5
	Repeat #3	57.5	52.5	45.5	32	27.5	24
	Repeat #4	67	51.35	46.125	41.5	31	21.5
	Mean value	59.5	51.4	42	35	29.5	21.5
	Standard deviation (SD)	5.017	3.853	5.34	5.339	1.78	3.894
	Strain	timepoint (min)
	nda3-KM311 spk1D	0	10	20	30	40	50
	Repeat #1	87.0504	83.1818	71.7964	39.9239	31.5069	18.6131
	Repeat #2	88.7805	85.6031	59.5798	38.4615	30.4183	15.2893
	Repeat #3	90.7258	87.2	67.3628	35	24.2153	15.1639
	Mean value	88.8522	85.3283	66.2463	37.7952	28.7135	16.3554
	Standard deviation (SD)	1.841	2.024	6.186	2.527	3.932	1.955
	Strain	timepoint (min)
	nda3-KM311	0	10	20	30	40	50
	Repeat #1	85.4545	79.8206	57.0136	41.0377	27.7551	23.2877
	Repeat #2	95.8904	92.3423	56.3786	38.0623	31.6239	18.9427
	Repeat #3	84.0637	82.1596	51.282	41.1483	27.668	17.4672
	Mean value	88.4696	84.7742	54.8914	40.0828	29.0157	19.8992
	Standard deviation (SD)	6.464	6.658	3.142	1.751	2.259	3.026
	Strain	timepoint (min)
	nda3-KM311 Padh21-pek1(DD)	0	10	20	30	40	50
	Repeat #1	92.6829	78.9916	54.5064	45.9575	40.3941	27.6699
	Repeat #2	89.5928	87.2	55.1331	41.0359	27.6859	16.8889
	Repeat #3	88.9952	83.0189	58.4677	37.9182	31.9549	30.3571
	Mean value	90.4236	83.0702	56.0358	41.6372	33.345	24.972
	Standard deviation (SD)	1.979	4.104	2.129	4.053	6.467	7.128
	Strain	timepoint (min)
	nda3-KM311 Padh11-pek1(DD)	0	10	20	30	40	50
	Repeat #1	83.8174	82.7004	71.2389	58.1897	46.3415	39.2857
	Repeat #2	87.1486	84.5865	66.7808	62.0209	45.5814	30.4348
	Repeat #3	86.7299	83.0357	67.1756	53.9034	45.0217	42.2594
	Mean value	85.8986	83.4409	68.3984	58.038	45.6482	37.3266
	Standard deviation (SD)	1.814	1.006	2.468	4.061	0.6624	6.151
	Strain	timepoint (min)
	nda3-KM311 Padh21-wis1(DD)	0	10	20	30	40	50
	Repeat #1	90.2439	88.3268	75.8197	52.0492	45.4545	42.735
	Repeat #2	96.6805	95.2899	75.7322	58.0986	45.2756	37.4517
	Repeat #3	92.2179	85.6482	57.6471	53.7217	48.855	49.1039
	Mean value	93.0474	89.755	69.733	54.6232	46.5284	43.0969
	Standard deviation (SD)	3.298	4.977	10.47	3.124	2.017	5.835
	Strain	timepoint (min)
	nda3-KM311 Padh11-wis1(DD)	0	10	20	30	40	50
	Repeat #1	91.8699	86.5613	67.7551	52.4528	47.6868	46.0251
	Repeat #2	93.6	92	86.6071	63.7615	60.6164	55.8333
	Repeat #3	88.5593	86.8932	71.9828	63.7288	60.7759	54.1063
	Mean value	91.3431	88.4848	75.4483	59.981	56.3597	51.9882
	Standard deviation (SD)	2.561	3.049	9.892	6.52	7.511	5.236
