# Supplementary material for: Negative regulation of APC/C activation by MAPK-mediated attenuation of Cdc20Slp1 under stress
Source: eLife. 2024 Oct 16;13:RP97896. doi: 10.7554/eLife.97896 (PMC11483130; doi:10.7554/eLife.97896)
Supplement: Figure 2—figure supplement 1—source data 2. [file elife-97896-fig2-figsupp1-data2.xlsx]

## Sheet: Figure 2-figure supplement 1B
		Counted bi-nucleate cells (%)
		Strain	timepoint after release at 25°C (min)
		cdc25-22	0	15	30	45	60	75	90	105	120	135	150	180	210
			0	0	0	0	17.3913	46.5116	74.0933	64.375	42.2222	26.9036	16.3043	7.40741	4.08163
		Strain	timepoint after release at 25°C (min)
		cdc25-22 pmk1Δ	0	15	30	45	60	75	90	105	120	135	150	180	210
			0	0	0	0	12.6984	30	61.9835	76.4103	62.0915	40.5882	20.9302	8.82353	6.54762
		Strain	timepoint after release at 25°C (min)
		cdc25-22 Padh11-pek1(DD)	0	15	30	45	60	75	90	105	120	135	150	180	210
			0	0	0	0	2	9.72973	33.1429	60.8696	69.2683	53.1579	30.9091	9.63855	3.80435
