# Supplementary material for: Negative regulation of APC/C activation by MAPK-mediated attenuation of Cdc20Slp1 under stress
Source: eLife. 2024 Oct 16;13:RP97896. doi: 10.7554/eLife.97896 (PMC11483130; doi:10.7554/eLife.97896)
Supplement: Figure 2—source data 2. [file elife-97896-fig2-data2.xlsx]

## Sheet: Fig. 2A
		Raw measurement ratio (Mad2-GFP + Mad3-GFP/Lid1-TAP)				Normalized ratio (Mad2-GFP + Mad3-GFP/Lid1-TAP)			Mean	SD	p values (vs WT)
		Repeat #1	Repeat #2	Repeat #3		Repeat #1	Repeat #2	Repeat #3
	nda3-KM311	1.3877	1.06382	0.85906	nda3-KM311	1	1	1	1
	nda3-KM311 Padh21-pek1(DD)	1.1144	0.815804	0.733086	nda3-KM311 Padh21-pek1(DD)	0.803054	0.766864	0.853358	0.807759	0.0354671	0.0016
	nda3-KM311 Padh11-pek1(DD)	0.450511	0.375543	0.378314	nda3-KM311 Padh11-pek1(DD)	0.324646	0.353014	0.440382	0.372681	0.0492527	<0.0001
	nda3-KM311 Padh21-wis1(DD)	1.54199	1.23713	0.791818	nda3-KM311 Padh21-wis1(DD)	1.11119	1.16291	0.921726	1.06528	0.103678	0.4236
	nda3-KM311 Padh11-wis1(DD)	2.0371	1.65034	1.06724	nda3-KM311 Padh11-wis1(DD)	1.46797	1.55134	1.24233	1.42055	0.130532	0.0104
		Raw measurement ratio (Slp1/Lid1-TAP)				Normalized ratio (Slp1/Lid1-TAP)			Mean	SD	p values (vs WT)
		Repeat #1	Repeat #2	Repeat #3		Repeat #1	Repeat #2	Repeat #3
	nda3-KM311	1.35121	0.781243	1.06596	nda3-KM311	1	1	1	1
	nda3-KM311 Padh21-pek1(DD)	1.04765	0.484396	0.863121	nda3-KM311 Padh21-pek1(DD)	0.775342	0.620033	0.809716	0.73503	0.0825173	0.0105
	nda3-KM311 Padh11-pek1(DD)	0.566328	0.432904	0.619022	nda3-KM311 Padh11-pek1(DD)	0.419127	0.554123	0.58072	0.51799	0.0707447	0.0006
	nda3-KM311 Padh21-wis1(DD)	1.37586	1.27414	1.44527	nda3-KM311 Padh21-wis1(DD)	1.01824	1.63092	1.35584	1.335	0.250556	0.1316
	nda3-KM311 Padh11-wis1(DD)	2.4953	1.76967	2.24591	nda3-KM311 Padh11-wis1(DD)	1.84672	2.2652	2.10695	2.07295	0.172527	0.0009

## Sheet: Fig. 2B
		Raw measurement ratio (Slp1/Cdc2)				Normalized ratio (Slp1/Cdc2)			Mean	SD	p values (vs WT)
		Repeat #1	Repeat #2	Repeat #3		Repeat #1	Repeat #2	Repeat #3
	nda3-KM311	0.994225	0.908576	0.753274	nda3-KM311	1	1	1	1	0
	nda3-KM311 Padh21-pek1(DD)	1.11982	0.784535	0.713504	nda3-KM311 Padh21-pek1(DD)	1.12632	0.863478	0.947204	0.979002	0.1343	0.7999	ns
	nda3-KM311 Padh11-pek1(DD)	0.576047	0.435307	0.433064	nda3-KM311 Padh11-pek1(DD)	0.579393	0.479109	0.574909	0.54447	0.05665	0.0002	***
	nda3-KM311 Padh21-wis1(DD)	0.855834	0.973902	0.780204	nda3-KM311 Padh21-wis1(DD)	0.860805	1.0719	1.03575	0.989485	0.1129	0.8797	ns
	nda3-KM311 Padh11-wis1(DD)	0.943063	0.876448	0.824831	nda3-KM311 Padh11-wis1(DD)	0.948541	0.96464	1.09499	1.00273	0.08031	0.9559	ns

## Sheet: Fig. 2C
		Raw measurement ratio (Slp1/Cdc2)				Normalized ratio (Slp1/Cdc2)			Mean	SD	p values (vs WT)
		Repeat #1	Repeat #2	Repeat #3		Repeat #1	Repeat #2	Repeat #3
	nda3-KM311	0.697749	0.904484	1.57345	nda3-KM311	1	1	1	1	0
	nda3-KM311 pmk1Δ	0.924092	1.23277	2.17698	nda3-KM311 pmk1Δ	1.32439	1.36295	1.38357	1.35697	0.03004	<0.0001	****
	nda3-KM311 sty1-T97A	0.632548	0.835292	1.83529	nda3-KM311 sty1-T97A	0.906555	0.923501	1.16641	0.998823	0.1454	0.9895	ns
	nda3-KM311 pmk1Δ sty1-T97A	0.932084	1.2519	2.19062	nda3-KM311 pmk1Δ sty1-T97A	1.33584	1.38411	1.39224	1.37073	0.03049	<0.0001	****

## Sheet: Fig. 2D
		mRNA levels (slp1+/act1+)
	Genotype:	Repeat #1:	Repeat #2:	Repeat #3:	Mean	SD	P value (vs wild type)
	wild type	1	1	1	1	0
	Padh11-pek1-DD	1.36	1.13	1.23	1.24	0.094163	ns (p=0.0867)
	Padh11-wis1-DD	0.889	0.93	1.06	0.959667	0.0728941	ns (p=0.4792)
