# Supplementary material for: Negative regulation of APC/C activation by MAPK-mediated attenuation of Cdc20Slp1 under stress
Source: eLife. 2024 Oct 16;13:RP97896. doi: 10.7554/eLife.97896 (PMC11483130; doi:10.7554/eLife.97896)
Supplement: Figure 3—figure supplement 3—source data 1. [file elife-97896-fig3-figsupp3-data1.xlsx]

## Sheet: Figure 3-figure supplement 3
	Cells with Cdc13-GFP on SPBs (%)
	Strain	timepoint after release at 30°C (min)
	nda3-KM311 slp1Δ lys1Δ::Pslp1-slp1(WT)	0	50
	Repeat #1	84.5	18.31
	Repeat #2	86.38	16.3
	Repeat #3	89.5	16.59
	Mean value	86.7933	17.0667
	Standard deviation (SD)	2.525	1.086
	Strain	timepoint after release at 30°C (min)
	nda3-KM311 slp1Δ lys1Δ::Pslp1-slp1(K19A,K20A,R21A,K47A,R48A)	0	50
	Repeat #1	75.88	24.13
	Repeat #2	62	19.63
	Repeat #3	68.8	14.29
	Mean value	68.8933	19.35
	Standard deviation (SD)	6.94	4.926
	p value vs WT strain (nda3-KM311)	0.0137	0.4769
	Strain	timepoint after release at 30°C (min)
	nda3-KM311 slp1Δ lys1Δ::Pslp1-slp1(PDSP-K19A,K20A,R21A,K47A,R48A)	0	50
	Repeat #1	83.58	14.93
	Repeat #2	79.55	27.53
	Repeat #3	74.88	22.99
	Mean value	79.3367	21.8167
	Standard deviation (SD)	4.354	6.381
	p value vs WT strain (nda3-KM311)	0.0622	0.2726
	Strain	timepoint after release at 30°C (min)
	nda3-KM311 slp1Δ lys1Δ::Pslp1-slp1(PDSP-K19A,K20A,R21A,K47A,R48A) pmk1Δ	0	50
	Repeat #1	56.32	19.5
	Repeat #2	62.31	28.29
	Repeat #3	73.72	12.81
	Mean value	64.1167	20.2
	Standard deviation (SD)	8.84	7.764
	p value vs WT strain (nda3-KM311)	0.0129	0.5268
	Strain	timepoint after release at 30°C (min)
	nda3-KM311 slp1Δ lys1Δ::Pslp1-slp1(WT) Z::Padh11-pek1(DD)	0	50
	Repeat #1	83.95	39.09
	Repeat #2	88.85	30.78
	Repeat #3	80.98	42.41
	Mean value	84.5933	37.4267
	Standard deviation (SD)	3.974	5.991
	Strain	timepoint after release at 30°C (min)
	nda3-KM311 slp1Δ lys1Δ::Pslp1-slp1(K19A,K20A,R21A,K47A,R48A) Z::Padh11-pek1(DD)	0	50
	Repeat #1	70.1	22.4
	Repeat #2	75.73	27.25
	Repeat #3	65.25	16.35
	Mean value	70.36	22
	Standard deviation (SD)	5.245	5.461
	p value vs WT pek1(DD) strain (nda3-KM311)	0.02	0.03
	Strain	timepoint after release at 30°C (min)
	nda3-KM311 slp1Δ lys1Δ::Pslp1-slp1(WT) Z::Padh11-pek1(DD) pmk1Δ	0	50
	Repeat #1	56.09	23.1
	Repeat #2	75.25	21.25
	Repeat #3	68.33	15.35
	Mean value	66.5567	19.9
	Standard deviation (SD)	9.702	4.048
	p value vs WT pek1(DD) strain (nda3-KM311)	0.0408	0.0137
