# Supplementary material for: Negative regulation of APC/C activation by MAPK-mediated attenuation of Cdc20Slp1 under stress
Source: eLife. 2024 Oct 16;13:RP97896. doi: 10.7554/eLife.97896 (PMC11483130; doi:10.7554/eLife.97896)
Supplement: Figure 3—source data 2. [file elife-97896-fig3-data2.xlsx]

## Sheet: Fig. 3D
		Raw measurement ratio (Slp1/Cdc2)				Normalized ratio (Slp1/Cdc2)			Mean	SD	p values (vs WT)
		Repeat #1	Repeat #2	Repeat #3		Repeat #1	Repeat #2	Repeat #3
	nda3-KM311	0.424104	0.76212	0.715377	nda3-KM311	1	1	1	1	0
	nda3-KM311 pmk1Δ	0.663205	0.996711	0.83349	nda3-KM311 pmk1Δ	1.56378	1.30781	1.16511	1.34557	0.202	0.0414	*
	nda3-KM311 lys1Δ::Pslp1-slp1(K19E,K20E,R21E,K47E,R48E)	0.630019	1.21449	0.944079	nda3-KM311 lys1Δ::Pslp1-slp1(K19E,K20E,R21E,K47E,R48E)	1.48553	1.59357	1.31969	1.46626	0.1379	0.0042	**
	nda3-KM311 lys1Δ::Pslp1-slp1(PDSP-K19E,K20E,R21E,K47E,R48E)	0.469599	0.774594	0.789177	nda3-KM311 lys1Δ::Pslp1-slp1(PDSP-K19E,K20E,R21E,K47E,R48E)	1.10727	1.01637	1.10316	1.0756	0.05134	0.0633	ns
		Raw measurement ratio (Slp1/Cdc2)				Normalized ratio (Slp1/Cdc2)			Mean	SD	p values (vs WT)		p values (vs pek1DD)
		Repeat #1	Repeat #2	Repeat #3		Repeat #1	Repeat #2	Repeat #3
	nda3-KM311	0.440784	0.567568	0.369369	nda3-KM311	1	1	1	1	0
	nda3-KM311 lys1Δ::Padh11-pek1-DD	0.330789	0.38898	0.252467	nda3-KM311 lys1Δ::Padh11-pek1-DD	0.750456	0.685346	0.683509	0.706437	0.03813	0.0002	***
	nda3-KM311 lys1Δ::Pslp1-slp1(K19E,K20E,R21E,K47E,R48E)	0.684926	0.802345	0.530151	nda3-KM311 lys1Δ::Pslp1-slp1(K19E,K20E,R21E,K47E,R48E)	1.55388	1.41366	1.43529	1.46761	0.07549	0.0004	***
	nda3-KM311 lys1Δ::Pslp1-slp1(K19E,K20E,R21E,K47E,R48E) Z::Padh11-pek1-DD	0.570255	0.660017	0.472984	nda3-KM311 lys1Δ::Pslp1-slp1(K19E,K20E,R21E,K47E,R48E) Z::Padh11-pek1-DD	1.29373	1.16289	1.28052	1.24571	0.07203	0.0041	**	0.0003	***
	nda3-KM311 pmk1Δ Z::Padh11-pek1-DD	0.571915	0.717235	0.487433	nda3-KM311 pmk1Δ Z::Padh11-pek1-DD	1.2975	1.2637	1.31963	1.29361	0.02817	﹤0.0001	****	﹤0.0001	****

## Sheet: Fig. 3E
	Cells with Cdc13-GFP on SPBs (%)
	Strain	timepoint (min)
	nda3-KM311 slp1Δ lys1Δ::Pslp1-slp1(WT)	0	10	20	30	40	50
	Repeat #1	84.5	79.8	65.11	38.61	24.8	18.31
	Repeat #2	86.38	81.11	71.22	36.75	23.04	16.3
	Repeat #3	89.5	75.36	65.8	39	31.03	16.59
	Mean value	86.7933	78.7567	67.3767	38.12	26.29	17.0667
	Standard deviation (SD)	2.525	3.014	3.346	1.202	4.198	1.086
	Strain	timepoint (min)
	nda3-KM311 slp1Δ lys1Δ::Pslp1-slp1(K19A,K20A,R21A,K47A,R48A)	0	10	20	30	40	50
	Repeat #1	75.88	59.65	45.28	40.04	28.02	24.13
	Repeat #2	62	55.56	38.24	32.16	29.48	19.63
	Repeat #3	68.8	60.58	48.31	38.07	27.78	14.29
	Mean value	68.8933	58.5967	43.9433	36.7567	28.4267	19.35
	Standard deviation (SD)	6.94	2.671	5.166	4.101	0.9201	4.926
	Strain	timepoint (min)
	nda3-KM311 slp1Δ lys1Δ::Pslp1-slp1(PDSP-K19A,K20A,R21A,K47A,R48A)	0	10	20	30	40	50
	Repeat #1	83.58	71.75	42.41	37.33	27.23	14.93
	Repeat #2	79.55	67.08	65.24	47.97	39.73	27.53
	Repeat #3	74.88	59	45.62	42.68	30.35	22.99
	Mean value	79.3367	65.9433	51.09	42.66	32.4367	21.8167
	Standard deviation (SD)	4.354	6.451	12.36	5.32	6.506	6.381
	Strain	timepoint (min)
	nda3-KM311 slp1Δ lys1Δ::Pslp1-slp1(PDSP-K19A,K20A,R21A,K47A,R48A) pmk1Δ	0	10	20	30	40	50
	Repeat #1	56.32	53.56	37.75	32.7	27.31	19.5
	Repeat #2	62.31	54.73	41.55	41.28	37.5	28.29
	Repeat #3	73.72	65.35	42.92	29.91	22.61	12.81
	Mean value	64.1167	57.88	40.74	34.63	29.14	20.2
	Standard deviation (SD)	8.84	6.496	2.678	5.926	7.612	7.764
	Strain	timepoint (min)
	nda3-KM311 slp1Δ lys1Δ::Pslp1-slp1(WT) Z::Padh11-pek1(DD)	0	10	20	30	40	50
	Repeat #1	83.95	79.41	58.88	49.81	42.75	39.09
	Repeat #2	88.85	85.47	66.82	62.2	45.85	30.78
	Repeat #3	80.98	78.35	67.55	53.35	45.165	42.41
	Mean value	84.5933	81.0767	64.4167	55.12	44.5883	37.4267
	Standard deviation (SD)	3.974	3.841	4.809	6.382	1.628	5.991
	Strain	timepoint (min)
	nda3-KM311 slp1Δ lys1Δ::Pslp1-slp1(K19A,K20A,R21A,K47A,R48A) Z::Padh11-pek1(DD)	0	10	20	30	40	50
	Repeat #1	70.1	60.74	42.95	36.98	35.33	22.4
	Repeat #2	75.73	68.49	57.11	45.07	42.15	27.25
	Repeat #3	65.25	58.33	43.85	34.47	26.95	16.35
	Mean value	70.36	62.52	47.97	38.84	34.81	22
	Standard deviation (SD)	5.245	5.309	7.928	5.539	7.613	5.461
	Strain	timepoint (min)
	nda3-KM311 slp1Δ lys1Δ::Pslp1-slp1(WT) Z::Padh11-pek1(DD) pmk1Δ	0	10	20	30	40	50
	Repeat #1	56.09	51.92	38.43	32.23	31.34	23.1
	Repeat #2	75.25	70.4	56.25	38.15	33.48	21.25
	Repeat #3	68.33	56.33	41.22	37.88	32.55	15.35
	Mean value	66.5567	59.55	45.3	36.0867	32.4567	19.9
	Standard deviation (SD)	9.702	9.652	9.585	3.343	1.073	4.048
