# Supplementary material for: Negative regulation of APC/C activation by MAPK-mediated attenuation of Cdc20Slp1 under stress
Source: eLife. 2024 Oct 16;13:RP97896. doi: 10.7554/eLife.97896 (PMC11483130; doi:10.7554/eLife.97896)
Supplement: Figure 4—figure supplement 3—source data 2. [file elife-97896-fig4-figsupp3-data2.xlsx]

## Sheet: Figure 4-figure supplement 3C
		Raw measurement ratio (Slp1 pT480/Slp1)				Normalized ratio (Slp1 pT480/Slp1)			Mean	SD	p values (vs mts3-1 slp1(1-60aa)-mEGFP-2NLS-GST-slp1(456-488aa))		p values
		Repeat #1	Repeat #2	Repeat #3		Repeat #1	Repeat #2	Repeat #3
	mts3-1 slp1(1-60aa)-mEGFP-2NLS-GST-slp1(456-488aa)	0.775615	0.802327	1.27446	mts3-1 slp1(1-60aa)-mEGFP-2NLS-GST-slp1(456-488aa)	1	1	1	1	0
	mts3-1 slp1(1-60aa)-mEGFP-2NLS-GST-slp1(456-488aa) pmk1-GBP-mCherry	0.919405	0.992214	1.59735	mts3-1 slp1(1-60aa)-mEGFP-2NLS-GST-slp1(456-488aa) pmk1-GBP-mCherry	1.18539	1.23667	1.25336	1.22514	0.03542	0.0004	***	strain #2 vs strain #5	0.002	**
	mts3-1 slp1(1-60aa)-mEGFP-2NLS-GST-slp1(456-488aa) pmk1Δ	0.075361	0.0310437	0.0696834	mts3-1 slp1(1-60aa)-mEGFP-2NLS-GST-slp1(456-488aa) pmk1Δ	0.097163	0.0386921	0.0546769	0.0635106	0.03022	0.0001	****
	mts3-1 slp1(1-60aa)-mEGFP-2NLS-GST-slp1(456-488aa) pek1-DD	0.94788	1.02342	1.70335	mts3-1 slp1(1-60aa)-mEGFP-2NLS-GST-slp1(456-488aa) pek1-DD	1.2221	1.27557	1.33653	1.27807	0.05726	0.0011	**	strain #4 vs strain #2	0.245	ns
	mts3-1 slp1(1-60aa)-mEGFP-2NLS-GST-slp1(456-488aa) pmk1-GBP-mCherry pek1-DD	1.19645	1.17257	2.02712	mts3-1 slp1(1-60aa)-mEGFP-2NLS-GST-slp1(456-488aa) pmk1-GBP-mCherry pek1-DD	1.54258	1.46146	1.59057	1.53154	0.06526	0.0001	***	strain #4 vs strain #5	0.0072	**
