# Supplementary material for: Negative regulation of APC/C activation by MAPK-mediated attenuation of Cdc20Slp1 under stress
Source: eLife. 2024 Oct 16;13:RP97896. doi: 10.7554/eLife.97896 (PMC11483130; doi:10.7554/eLife.97896)
Supplement: Figure 4—figure supplement 5—source data 2. [file elife-97896-fig4-figsupp5-data2.xlsx]

## Sheet: Figure 4-figure supplement 5
		Raw measurement ratio (Slp1/Cdc2)				Normalized ratio (Slp1/Cdc2)			Mean	SD	p values (vs WT)
		Repeat #1	Repeat #2	Repeat #3		Repeat #1	Repeat #2	Repeat #3
	nda3-KM311 ( synchronized by HU & 18°C, 6hr)	0.305753	0.361702	0.279946	nda3-KM311 ( synchronized by HU & 18°C, 6hr)	1.85218	2.35885	2.40515	2.20539	0.3068	0.0024	**
	nda3-KM311 (asynchronously grown)	0.165077	0.153338	0.116395	nda3-KM311 (asynchronously grown)	1	1	1	1	0
	nda3-KM311 lys1Δ::Pslp1-slp1(S28A,T31A,S59A, S50A)	0.159204	0.128785	0.131299	nda3-KM311 lys1Δ::Pslp1-slp1(S28A,T31A,S59A, S50A)	0.964422	0.839873	1.12805	0.977448	0.1445	0.8003	n.s.
	nda3-KM311 lys1Δ::Pslp1-slp1(S28A,T31A,S59A, S50A, S76A)	0.19102	0.139178	0.12775	nda3-KM311 lys1Δ::Pslp1-slp1(S28A,T31A,S59A, S50A, S76A)	1.15716	0.907654	1.09756	1.05412	0.1303	0.5117	n.s.
	nda3-KM311 lys1Δ::Pslp1-slp1(S28A,T31A,S59A, S50A, S76A,T480A)	0.171233	0.108828	0.146203	nda3-KM311 lys1Δ::Pslp1-slp1(S28A,T31A,S59A, S50A, S76A,T480A)	1.03729	0.709725	1.2561	1.00104	0.275	0.9951	n.s.
	nda3-KM311 lys1Δ::Pslp1-slp1(T480A)	0.331384	0.400137	0.288226	nda3-KM311 lys1Δ::Pslp1-slp1(T480A)	2.00745	2.60951	2.47629	2.36441	0.3162	0.0017	**
	nda3-KM311 lys1Δ::Pslp1-slp1(S76A,T480A)	0.476968	0.546852	0.399663	nda3-KM311 lys1Δ::Pslp1-slp1(S76A,T480A)	2.88937	3.56631	3.43369	3.29646	0.3587	0.0004	***
	nda3-KM311 pmk1Δ	0.188786	0.177431	0.104487	nda3-KM311 pmk1Δ	1.14363	1.15712	0.897696	1.06615	0.146	0.4766	n.s.
