# Supplementary material for: Negative regulation of APC/C activation by MAPK-mediated attenuation of Cdc20Slp1 under stress
Source: eLife. 2024 Oct 16;13:RP97896. doi: 10.7554/eLife.97896 (PMC11483130; doi:10.7554/eLife.97896)
Supplement: Figure 4—figure supplement 6—source data 1. [file elife-97896-fig4-figsupp6-data1.xlsx]

## Sheet: Figure 4-figure supplement 6
	Cells with Cdc13-GFP on SPBs (%)
	Strain	timepoint (min)
	nda3-KM311 slp1Δ lys1Δ::Pslp1-slp1(WT)	0	10	20	30	40	50
	Repeat #1	89.3	70.4	60.4	41.4	30.7	21.15
	Repeat #2	83.165	71.9433	37.8947	30.855	22.1799	15.8723
	Repeat #3	84.2	68.3	63.4	45.7	36.7	26
	Mean value	85.555	70.2144	53.8982	39.3183	29.86	21.0074
	Standard deviation (SD)	3.286	1.827	13.94	7.636	7.296	5.067
	Strain	timepoint (min)
	nda3-KM311 slp1Δ lys1Δ::Pslp1-slp1(T480A)	0	10	20	30	40	50
	Repeat #1	70.56	59.83	49.91	36.64	20.71	18.14
	Repeat #2	75	59	38.4	30.8	25.9	15.8
	Repeat #3	83	61.7	45.9	30.6	26.8	16
	Mean value	76.1867	60.1767	44.7367	32.68	24.47	16.6467
	Standard deviation (SD)	6.304	1.383	5.843	3.431	3.287	1.297
	p value vs WT strain (nda3-KM311 slp1Δ lys1Δ::Pslp1-slp1(WT))	0.0846					0.2222
	Strain	timepoint (min)
	nda3-KM311 slp1Δ lys1Δ::Pslp1-slp1(S76A,T480A)	0	10	20	30	40	50
	Repeat #1	72.9	55.7	42.5	30.5	23.9	19.5
	Repeat #2	62.1	49.6	31.5	31.3	25.1	17.6
	Repeat #3	67	48.55	37.3	30	26	13.8
	Mean value	67.3333	51.2833	37.1	30.6	25	16.9667
	Standard deviation (SD)	5.408	3.861	5.503	0.6557	1.054	2.902
	p value vs WT strain (nda3-KM311 slp1Δ lys1Δ::Pslp1-slp1(WT))	0.0076					0.2969
	Strain	timepoint (min)
	nda3-KM311 slp1Δ lys1Δ::Pslp1-slp1(WT) pmk1Δ::ura4+	0	10	20	30	40	50
	Repeat #1	58.91	46.55	37.6	28.5	22.66	16.31
	Repeat #2	67.25	49.4	32.9	25.125	20.85	12.35
	Repeat #3	62.48	47.33	40.04	35.56	30	26.5
	Mean value	62.88	47.76	36.8467	29.7283	24.5033	18.3867
	Standard deviation (SD)	4.184	1.473	3.629	5.323	4.846	7.3
	p value vs WT strain (nda3-KM311 slp1Δ lys1Δ::Pslp1-slp1(WT))	0.0018					0.6365
	Strain	timepoint (min)
	nda3-KM311 slp1Δ lys1Δ::Pslp1-slp1(WT) Z::Padh11-pek1(DD)	0	10	20	30	40	50
	Repeat #1	86.55	76.38	56.125	50.75	40.76	37.29
	Repeat #2	89.25	81.36	68.82	64.125	47.55	40.825
	Repeat #3	82.08	77.49	59.35	54.55	45.15	33.12
	Mean value	85.96	78.41	61.4317	56.475	44.4867	37.0783
	Standard deviation (SD)	3.621	2.614	6.599	6.892	3.443	3.857
	Strain	timepoint (min)
	nda3-KM311 slp1Δ lys1Δ::Pslp1-slp1(T480A) Z::Padh11-pek1(DD)	0	10	20	30	40	50
	Repeat #1	73.89	66.55	49.28	38.14	25.26	19.88
	Repeat #2	82.86	73.72	53.5	49.54	38.37	29.39
	Repeat #3	78.75	63.25	46.66	35.68	28.43	21.43
	Mean value	78.5	67.84	49.8133	41.12	30.6867	23.5667
	Standard deviation (SD)	4.49	5.353	3.451	7.395	6.84	5.102
	p value vs WT strain (nda3-KM311 slp1Δ lys1Δ::Pslp1-slp1(WT) Z::Padh11-pek1(DD) )	0.0886					0.0216
	Strain	timepoint (min)
	nda3-KM311 slp1Δ lys1Δ::Pslp1-slp1(S76A,T480A) Z::Padh11-pek1(DD)	0	10	20	30	40	50
	Repeat #1	72.62	66.09	51.09	46.52	32.8	26.89
	Repeat #2	65.88	55.95	45.95	32.96	22.18	12.76
	Repeat #3	74.11	50	32.72	27.89	22.1	14.4
	Mean value	70.87	57.3467	43.2533	35.79	25.6933	18.0167
	Standard deviation (SD)	4.385	8.135	9.477	9.632	6.155	7.728
	p value vs WT strain (nda3-KM311 slp1Δ lys1Δ::Pslp1-slp1(WT) Z::Padh11-pek1(DD) )	0.0101					0.0187
	First group
	Cells with Cdc13-GFP on SPBs (%)
	Strain	timepoint (min)
	nda3-KM311 slp1Δ lys1::Pslp1-slp1(WT)	0	10	20	30	40	50
	Repeat #1	85.7339	74.2276	52.2449	40.2878	24.1993	15.3077
	Repeat #2	83.5766	73.7069	51.1416	40.3509	28.6408	23.0159
	Repeat #3	79.5556	66.8122	45.7143	38.8057	24.4918	15.5556
	Repeat #4	80.2308	69.0164	47.2881	36.6818	29.1589	19.3458
	Repeat #5	88.165	71.9433	49.8947	35.855	25.1799	17.8723
	Repeat #6	82.188	72.597	54.1463	46.7148	33.6337	17.094
	Mean value	83.2416	71.3839	50.0717	39.7827	27.5507	18.0319
	Standard deviation (SD)	3.293	2.892	3.139	3.861	3.659	2.865
	Strain	timepoint (min)
	nda3-KM311 slp1Δ lys1::Pslp1-slp1(S28A,T31A)	0	10	20	30	40	50
	Repeat #1	75.5263	67.3451	34.8361	29.717	22.7273	11.4504
	Repeat #2	61.8925	56.2724	35.7401	30.4659	21.6327	16.129
	Repeat #3	75.4824	62.5	45.7516	35.7143	29.7398	19.7531
	Repeat #4	72.2509	63.4328	50	36.3265	28.27	22.8216
	Repeat #5	69.1765	53.9623	50.6993	38.1119	32.6087	24.7059
	Mean value	70.8657	60.7025	43.4054	34.0671	26.9957	18.972
	Standard deviation (SD)	5.665	5.476	7.654	3.742	4.681	5.315
	p value vs WT strain (nda3-KM311)	0.0014					0.7166
	Strain	timepoint (min)
	nda3-KM311 slp1Δ lys1Δ::Pslp1-slp1(S28A,T31A,S59A)	0	10	20	30	40	50
	Repeat #1	72.04	56.4	45.29	36.36	24.62	14.94
	Repeat #2	60.49	52	44	40.98	30.19	23.27
	Repeat #3	75.51	63.4	52.06	35.23	21.1	17.63
	Mean value	69.3467	57.2667	47.1167	37.5233	25.3033	18.6133
	Standard deviation (SD)	7.864	5.749	4.329	3.046	4.583	4.251
	p value vs WT strain (nda3-KM311)	0.0059					0.812
	Strain	timepoint (min)
	nda3-KM311 slp1Δ lys1Δ::Pslp1-slp1(S28A,T31A,S59A,S76A)	0	10	20	30	40	50
	Repeat #1	69.34	52.24	38.53	34	26.04	18.62
	Repeat #2	67.53	47.24	37.58	29.15	25.14	19.52
	Repeat #3	65.25	57.18	43.78	36.98	19.56	17.85
	Mean value	67.3733	52.22	39.9633	33.3767	23.58	18.6633
	Standard deviation (SD)	2.049	4.97	3.339	3.952	3.51	0.8358
	p value vs WT strain (nda3-KM311)	0.0001					0.7282
	Strain	timepoint (min)
	nda3-KM311 slp1Δ lys1Δ::Pslp1-slp1(S28A,T31A,S59A,S76A,T480A)	0	10	20	30	40	50
	Repeat #1	75.54	59.25	45.84	33.39	20.87	16.81
	Repeat #2	56.48	41.67	29.27	27.13	17.37	14.68
	Repeat #3	66.72	50.18	36.85	32.63	28.56	17.84
	Mean value	66.2467	50.3667	37.32	31.05	22.2667	16.4433
	Standard deviation (SD)	9.539	8.791	8.295	3.416	5.724	1.612
	p value vs WT strain (nda3-KM311)	0.0044					0.4107
	Second group
	Cells with Cdc13-GFP on SPBs (%)
	Strain	timepoint (min)
	nda3-KM311 slp1Δ lys1Δ::Pslp1-slp1(WT) Z::Padh11-pek1(DD)	0	10	20	30	40	50
	Repeat #1	86.55	76.38	56.125	50.75	40.76	37.29
	Repeat #2	89.25	81.36	68.82	64.125	47.55	40.825
	Repeat #3	82.08	77.49	59.35	54.55	45.15	33.12
	Mean value	85.96	78.41	61.4317	56.475	44.4867	37.0783
	Standard deviation (SD)	3.621	2.614	6.599	6.892	3.443	3.857
	Strain	timepoint (min)
	nda3-KM311 slp1Δ lys1Δ::Pslp1-slp1(S28A,T31A) Z::Padh11-pek1(DD)	0	10	20	30	40	50
	Repeat #1	77.68	70.77	50.8	41.72	30	22.37
	Repeat #2	75.88	65.56	63.71	57.33	41.05	30.98
	Repeat #3	64.25	59.125	57.84	49.36	38.79	19.45
	Mean value	72.6033	65.1517	57.45	49.47	36.6133	24.2667
	Standard deviation (SD)	7.29	5.833	6.464	7.806	5.838	5.994
	p value vs WT pek(DD) strain (nda3-KM311)	0.0468					0.0358
	Strain	timepoint (min)
	nda3-KM311 slp1Δ lys1Δ::Pslp1-slp1(S28A,T31A,S59A) Z::Padh11-pek1(DD)	0	10	20	30	40	50
	Repeat #1	70.48	65.44	57.81	49.54	38.91	25.11
	Repeat #2	65.49	57	44	42.98	30.19	22.27
	Repeat #3	75.51	67.4	52.06	35.23	21.1	15.63
	Mean value	70.4933	63.28	51.29	42.5833	30.0667	21.0033
	Standard deviation (SD)	5.01	5.526	6.937	7.163	8.906	4.865
	p value vs WT pek(DD) strain (nda3-KM311)	0.0123					0.011
	Strain	timepoint (min)
	nda3-KM311 slp1Δ lys1Δ::Pslp1-slp1(S28A,T31A,S59A,S76A) Z::Padh11-pek1(DD)	0	10	20	30	40	50
	Repeat #1	66.36	56.11	48.02	43.69	32.1	26.86
	Repeat #2	78.24	68.15	49.63	46.67	23.27	15.61
	Repeat #3	65.25	55.125	42.83	36.52	27.96	16
	Mean value	69.95	59.795	46.8267	42.2933	27.7767	19.49
	Standard deviation (SD)	7.201	7.251	3.554	5.217	4.418	6.386
	p value vs WT pek(DD) strain (nda3-KM311)	0.0263					0.0151
	Strain	timepoint (min)
	nda3-KM311 slp1Δ lys1Δ::Pslp1-slp1(S28A,T31A,S59A,S76A,T480A) Z::Padh11-pek1(DD)	0	10	20	30	40	50
	Repeat #1	65.75	53.39	41.72	31.33	22.11	12.44
	Repeat #2	67.92	55.5	47.41	34.6	20.19	14.06
	Repeat #3	63.31	56.33	48.66	42	33.75	26.96
	Mean value	65.66	55.0733	45.93	35.9767	25.35	17.82
	Standard deviation (SD)	2.306	1.516	3.699	5.467	7.338	7.957
	p value vs WT pek(DD) strain (nda3-KM311)	0.0012					0.0196
