# Supplementary material for: Negative regulation of APC/C activation by MAPK-mediated attenuation of Cdc20Slp1 under stress
Source: eLife. 2024 Oct 16;13:RP97896. doi: 10.7554/eLife.97896 (PMC11483130; doi:10.7554/eLife.97896)
Supplement: Figure 4—source data 2. [file elife-97896-fig4-data2.xlsx]

## Sheet: Fig. 4G
		Raw measurement ratio (Slp1/Cdc2)				Normalized ratio (Slp1/Cdc2)			Mean	SD	p values (vs WT)
		Repeat #1	Repeat #2	Repeat #3		Repeat #1	Repeat #2	Repeat #3
	nda3-KM311 lys1Δ::Pslp1-slp1(WT)	0.217921	0.324731	0.32311	nda3-KM311 lys1Δ::Pslp1-slp1(WT)	1	1	1	1	0
	nda3-KM311 lys1Δ::Pslp1-slp1(S28A,T31A)	0.160753	0.336713	0.322469	nda3-KM311 lys1Δ::Pslp1-slp1(S28A,T31A)	0.737666	1.0369	0.998016	0.924193	0.1627	0.04649	ns
	nda3-KM311 lys1Δ::Pslp1-slp1(S28A,T31A,S59A)	0.192094	0.339112	0.339819	nda3-KM311 lys1Δ::Pslp1-slp1(S28A,T31A,S59A)	0.881485	1.04429	1.05171	0.992495	0.09621	0.8991	ns
	nda3-KM311 lys1Δ::Pslp1-slp1(S28A,T31A,S59A, S50A)	0.211765	0.315056	0.286816	nda3-KM311 lys1Δ::Pslp1-slp1(S28A,T31A,S59A, S50A)	0.971749	0.970206	0.887674	0.94321	0.0481	0.1103	ns
	nda3-KM311 lys1Δ::Pslp1-slp1(S28A,T31A,S59A, S50A, S76A)	0.202523	0.316048	0.33185	nda3-KM311 lys1Δ::Pslp1-slp1(S28A,T31A,S59A, S50A, S76A)	0.92934	0.973259	1.02705	0.97655	0.04894	0.4532	ns
	nda3-KM311 lys1Δ::Pslp1-slp1(S28A,T31A,S59A, S50A, S76A,T480A)	0.216606	0.290323	0.289916	nda3-KM311 lys1Δ::Pslp1-slp1(S28A,T31A,S59A, S50A, S76A,T480A)	0.993965	0.89404	0.897268	0.928424	0.05678	0.0944	ns
	nda3-KM311 lys1Δ::Pslp1-slp1(S76A,T480A)	0.402219	0.668516	0.698045	nda3-KM311 lys1Δ::Pslp1-slp1(S76A,T480A)	1.84571	2.05867	2.1604	2.02159	0.1606	0.0004	***
	nda3-KM311 lys1Δ::Pslp1-slp1(T480A)	0.321751	0.52606	0.524965	nda3-KM311 lys1Δ::Pslp1-slp1(T480A)	1.47646	1.61999	1.62473	1.57372	0.08427	0.0003	***
	nda3-KM311 pmk1Δ	0.287447	0.452211	0.45448	nda3-KM311 pmk1Δ	1.31904	1.39257	1.40658	1.37273	0.04702	0.0002	***
		Raw measurement ratio (Slp1/Cdc2)				Normalized ratio (Slp1/Cdc2)			Mean	SD	p values (vs WT)		p values (vs pek1DD)
		Repeat #1	Repeat #2	Repeat #3		Repeat #1	Repeat #2	Repeat #3
	nda3-KM311 lys1Δ::Pslp1-slp1(WT)	0.298077	0.693493	0.1875	nda3-KM311 lys1Δ::Pslp1-slp1(WT)	1	1	1	1	0
	nda3-KM311 lys1Δ::Padh11-pek1(DD)	0.15509	0.527304	0.137126	nda3-KM311 lys1Δ::Padh11-pek1(DD)	0.520301	0.760359	0.731337	0.670666	0.131	0.0121	*
	nda3-KM311 lys1Δ::Pslp1-slp1(T480A)	0.642902	1.09489	0.305363	nda3-KM311 lys1Δ::Pslp1-slp1(T480A)	2.15683	1.57881	1.6286	1.78808	0.3203	0.013	*
	nda3-KM311 lys1Δ::Pslp1-slp1(T480A) Z::Padh11-pek1(DD)	0.379246	0.835395	0.200741	nda3-KM311 lys1Δ::Pslp1-slp1(T480A) Z::Padh11-pek1(DD)	1.27231	1.20462	1.07062	1.18252	0.1026	0.0369	*	0.006	**
	nda3-KM311 lys1Δ::Pslp1-slp1(S76A,T480A)	0.743846	1.20376	0.421823	nda3-KM311 lys1Δ::Pslp1-slp1(S76A,T480A)	2.49548	1.73579	2.24972	2.16033	0.3877	0.0066	**
	nda3-KM311 lys1Δ::Pslp1-slp1(S76A,T480A) Z::Padh11-pek1(DD)	0.625078	1.07095	0.361822	nda3-KM311 lys1Δ::Pslp1-slp1(S76A,T480A) Z::Padh11-pek1(DD)	2.09704	1.54428	1.92972	1.85701	0.2835	0.0064	**	0.0028	**
	nda3-KM311 pmk1Δ Z::Padh11-pek1(DD)	0.445868	1.03214	0.278668	nda3-KM311 pmk1Δ Z::Padh11-pek1(DD)	1.49582	1.48831	1.48623	1.49012	0.005042	﹤0.0001	****	0.0004	***

## Sheet: Fig. 4H
	Cells with Cdc13-GFP on SPBs (%)
	Strain	timepoint (min)
	nda3-KM311 slp1Δ lys1Δ::Pslp1-slp1(WT)	0	10	20	30	40	50
	Repeat #1	89.3	70.4	60.4	41.4	30.7	21.15
	Repeat #2	83.165	71.9433	37.8947	30.855	22.1799	15.8723
	Repeat #3	84.2	68.3	63.4	45.7	36.7	26
	Mean value	85.555	70.2144	53.8982	39.3183	29.86	21.0074
	Standard deviation (SD)	3.286	1.827	13.94	7.636	7.296	5.067
	Strain	timepoint (min)
	nda3-KM311 slp1Δ lys1Δ::Pslp1-slp1(T480A)	0	10	20	30	40	50
	Repeat #1	70.56	59.83	49.91	36.64	20.71	18.14
	Repeat #2	75	59	38.4	30.8	25.9	15.8
	Repeat #3	83	61.7	45.9	30.6	26.8	16
	Mean value	76.1867	60.1767	44.7367	32.68	24.47	16.6467
	Standard deviation (SD)	6.304	1.383	5.843	3.431	3.287	1.297
	Strain	timepoint (min)
	nda3-KM311 slp1Δ lys1Δ::Pslp1-slp1(S76A,T480A)	0	10	20	30	40	50
	Repeat #1	72.9	55.7	42.5	30.5	23.9	19.5
	Repeat #2	62.1	49.6	31.5	31.3	25.1	17.6
	Repeat #3	67	48.55	37.3	30	26	13.8
	Mean value	67.3333	51.2833	37.1	30.6	25	16.9667
	Standard deviation (SD)	5.408	3.861	5.503	0.6557	1.054	2.902
	Strain	timepoint (min)
	nda3-KM311 slp1Δ lys1Δ::Pslp1-slp1(WT) pmk1Δ::ura4+	0	10	20	30	40	50
	Repeat #1	58.91	46.55	37.6	28.5	22.66	16.31
	Repeat #2	67.25	49.4	32.9	25.125	20.85	12.35
	Repeat #3	62.48	47.33	40.04	35.56	30	26.5
	Mean value	62.88	47.76	36.8467	29.7283	24.5033	18.3867
	Standard deviation (SD)	4.184	1.473	3.629	5.323	4.846	7.3
	Strain	timepoint (min)
	nda3-KM311 slp1Δ lys1Δ::Pslp1-slp1(WT) Z::Padh11-pek1(DD)	0	10	20	30	40	50
	Repeat #1	86.55	76.38	56.125	50.75	40.76	37.29
	Repeat #2	89.25	81.36	68.82	64.125	47.55	40.825
	Repeat #3	82.08	77.49	59.35	54.55	45.15	33.12
	Mean value	85.96	78.41	61.4317	56.475	44.4867	37.0783
	Standard deviation (SD)	3.621	2.614	6.599	6.892	3.443	3.857
	Strain	timepoint (min)
	nda3-KM311 slp1Δ lys1Δ::Pslp1-slp1(T480A) Z::Padh11-pek1(DD)	0	10	20	30	40	50
	Repeat #1	73.89	66.55	49.28	38.14	25.26	19.88
	Repeat #2	82.86	73.72	53.5	49.54	38.37	29.39
	Repeat #3	78.75	63.25	46.66	35.68	28.43	21.43
	Mean value	78.5	67.84	49.8133	41.12	30.6867	23.5667
	Standard deviation (SD)	4.49	5.353	3.451	7.395	6.84	5.102
	Strain	timepoint (min)
	nda3-KM311 slp1Δ lys1Δ::Pslp1-slp1(S76A,T480A) Z::Padh11-pek1(DD)	0	10	20	30	40	50
	Repeat #1	72.62	66.09	51.09	46.52	32.8	26.89
	Repeat #2	65.88	55.95	45.95	32.96	22.18	12.76
	Repeat #3	74.11	50	32.72	27.89	22.1	14.4
	Mean value	70.87	57.3467	43.2533	35.79	25.6933	18.0167
	Standard deviation (SD)	4.385	8.135	9.477	9.632	6.155	7.728
