# Supplementary material for: Negative regulation of APC/C activation by MAPK-mediated attenuation of Cdc20Slp1 under stress
Source: eLife. 2024 Oct 16;13:RP97896. doi: 10.7554/eLife.97896 (PMC11483130; doi:10.7554/eLife.97896)
Supplement: Figure 5—figure supplement 1—source data 1. [file elife-97896-fig5-figsupp1-data1.xlsx]

## Sheet: Figure 5-figure supplement 1
	Cells with Cdc13-GFP on SPBs (%)
	Strain	timepoint after release at 30°C (min)
	nda3-KM311	0	50
	Repeat #1	85.4545	23.2877
	Repeat #2	95.8904	18.9427
	Repeat #3	84.0637	17.4672
	Mean value	88.4696	19.8992
	Standard deviation (SD)	6.466	3.026
	Strain	timepoint after release at 30°C (min)
	nda3-KM311 apc15Δ	0	50
	Repeat #1	67.5325	19.6172
	Repeat #2	68.3258	21.875
	Repeat #3	69.869	25.8333
	Mean value	68.5758	22.4419
	Standard deviation (SD)	1.189	3.143
	p value vs WT strain (nda3-KM311)	0.0063	0.3698
	Strain	timepoint after release at 30°C (min)
	nda3-KM311 lys1::Padh11-pek1(DD)	0	50
	Repeat #1	83.8174	39.2857
	Repeat #2	87.1486	30.4348
	Repeat #3	86.7299	42.2594
	Mean value	85.8986	37.3266
	Standard deviation (SD)	1.814	6.155
	p value vs WT strain (nda3-KM311)	0.5442	0.0117
	Strain	timepoint after release at 30°C (min)
	nda3-KM311 apc15Δ lys1::Padh11-pek1(DD)	0	50
	Repeat #1	65.371	17.1875
	Repeat #2	63.8298	20
	Repeat #3	67.0588	22.1607
	Mean value	65.4199	19.7827
	Standard deviation (SD)	1.616	2.492
	p value vs WT strain (nda3-KM311)	0.0039	0.9614
	Strain	timepoint after release at 30°C (min)
	nda3-KM311 lys1::Padh11-wis1(DD)	0	50
	Repeat #1	91.8699	46.0251
	Repeat #2	93.6	55.8333
	Repeat #3	88.5593	54.1063
	Mean value	91.3431	51.9882
	Standard deviation (SD)	2.561	5.233
	p value vs WT strain (nda3-KM311)	0.5133	0.0008
	Strain	timepoint after release at 30°C (min)
	nda3-KM311 apc15Δ lys1::Padh11-wis1(DD)	0	50
	Repeat #1	67.9426	36.5546
	Repeat #2	60.7143	30.2326
	Repeat #3	71.9048	36.3636
	Mean value	66.8539	34.3836
	Standard deviation (SD)	5.674	3.595
	p value vs WT strain (nda3-KM311)	0.0121	0.0059
	Cells with Cdc13-GFP on SPBs (%)
	Strain	timepoint after release at 30°C (min)
	nda3-KM311 slp1Δ lys1Δ::Pslp1-slp1(WT)	0	50
	Repeat #1	87.47	12.33
	Repeat #2	74.76	13.04
	Repeat #3	87.5	22.88
	Repeat #4	88.39	21.97
	Repeat #5	82.35	20.66
	Repeat #6	79.16	23.15
	Mean value	83.2717	19.005
	Standard deviation (SD)	5.51191	4.97722
	Strain	timepoint after release at 30°C (min)
	nda3-KM311 slp1Δ lys1Δ::Pslp1-slp1(K472R)	0	50
	Repeat #1	79.51	18.5
	Repeat #2	66.78	13.48
	Repeat #3	77	13.9
	Mean value	74.43	15.2933
	Standard deviation (SD)	6.74291	2.78498
	p value vs WT strain (nda3-KM311 slp1Δ lys1Δ::Pslp1-slp1(WT))	0.0714	0.2779
	Strain	timepoint after release at 30°C (min)
	nda3-KM311 slp1Δ lys1Δ::Pslp1-slp1(K479R)	0	50
	Repeat #1	73.43	19.31
	Repeat #2	73.16	11.21
	Repeat #3	60.3	11.89
	Repeat #4	76.31	10.89
	Repeat #5	76.17	12.15
	Mean value	68.9633	14.1367
	Standard deviation (SD)	6.63638	3.51377
	p value vs WT strain (nda3-KM311 slp1Δ lys1Δ::Pslp1-slp1(WT))	0.0124	0.053
	Strain	timepoint after release at 30°C (min)
	nda3-KM311 slp1Δ lys1Δ::Pslp1-slp1(K472R, K479R)	0	50
	Repeat #1	52.97	15.71
	Repeat #2	69	18
	Repeat #3	66.67	14.88
	Mean value	62.88	16.1967
	Standard deviation (SD)	8.66102	1.61593
	p value vs WT strain (nda3-KM311 slp1Δ lys1Δ::Pslp1-slp1(WT))	0.0032	0.3858
	Strain	timepoint after release at 30°C (min)
	nda3-KM311 slp1Δ lys1Δ::Pslp1-slp1 pmk1Δ	0	50
	Repeat #1	58.61	16.98
	Repeat #2	66	20
	Repeat #3	71.98	15.05
	Mean value	65.53	17.3433
	Standard deviation (SD)	6.69738	2.49492
	p value vs WT strain (nda3-KM311 slp1Δ lys1Δ::Pslp1-slp1(WT))	0.0037	0.6108
	Strain #11158	timepoint after release at 30°C (min)
	nda3-KM311 slp1Δ lys1∆::Pslp1-slp1(WT) Z::Padh11-pek1(DD)	0	50
	Repeat #1	82.08	38.12
	Repeat #2	79.2	36.82
	Repeat #3	86.21	30.7
	Mean value	82.4967	35.2133
	Standard deviation (SD)	3.52353	3.96234
	Strain #11230	timepoint after release at 30°C (min)
	nda3-KM311 slp1Δ lys1∆::Pslp1-slp1(K472R) Z::Padh11-pek1(DD)	0	50
	Repeat #1	78.3	27.47
	Repeat #2	71.81	18.75
	Repeat #3	82.1	19.18
	Mean value	77.4033	21.8
	Standard deviation (SD)	5.20327	4.91507
	p value vs WT strain (nda3-KM311 slp1Δ lys1∆::Pslp1-slp1(WT) Z::Padh11-pek1(DD))	0.233	0.0212
	Strain #11177	timepoint after release at 30°C (min)
	nda3-KM311 slp1Δ lys1∆::Pslp1-slp1(K479R) Z::Padh11-pek1(DD)	0	50
	Repeat #1	69.45	26.2
	Repeat #2	75.75	20.19
	Repeat #3	64	18.75
	Mean value	69.7333	21.7133
	Standard deviation (SD)	5.88012	3.95171
	p value vs WT strain (nda3-KM311 slp1Δ lys1∆::Pslp1-slp1(WT) Z::Padh11-pek1(DD))	0.0321	0.0139
