# Supplementary material for: Negative regulation of APC/C activation by MAPK-mediated attenuation of Cdc20Slp1 under stress
Source: eLife. 2024 Oct 16;13:RP97896. doi: 10.7554/eLife.97896 (PMC11483130; doi:10.7554/eLife.97896)
Supplement: Figure 5—figure supplement 2—source data 2. [file elife-97896-fig5-figsupp2-data2.xlsx]

## Sheet: Figure 5-figure supplement 2
		Raw measurement ratio (Slp1/Cdc2)				Normalized ratio (Slp1/Cdc2)			Mean	SD	p values (vs WT)
		Repeat #1	Repeat #2	Repeat #3		Repeat #1	Repeat #2	Repeat #3
	nda3-KM311 +HU,18°C	0.297239	0.179596	0.360255	nda3-KM311 +HU,18°C	2.12791	2.31978	1.56413	2.22385	0.3928	0.0114	*
	nda3-KM311	0.139686	0.0774194	0.230323	nda3-KM311	1	1	1	1	0
	nda3-KM311 lys1Δ::Pslp1-slp1(K472R)	0.246562	0.125	0.316477	nda3-KM311 lys1Δ::Pslp1-slp1(K472R)	1.76512	1.61458	1.37406	1.68985	0.1972	0.0068	**
	nda3-KM311 lys1Δ::Pslp1-slp1(K479R)	0.354629	0.221347	0.542561	nda3-KM311 lys1Δ::Pslp1-slp1(K479R)	2.53876	2.85906	2.35566	2.69891	0.2548	0.0004	***
	nda3-KM311 lys1Δ::Pslp1-slp1(K472R,K479R)	0.464537	0.241212	0.59146	nda3-KM311 lys1Δ::Pslp1-slp1(K472R,K479R)	3.32558	3.11565	2.56796	3.22062	0.3912	0.0009	***
	nda3-KM311 apc15Δ	0.193286	0.106118	0.261505	nda3-KM311 apc15Δ	1.38372	1.37069	1.13539	1.37721	0.1398	0.0213	*
