# Supplementary material for: Negative regulation of APC/C activation by MAPK-mediated attenuation of Cdc20Slp1 under stress
Source: eLife. 2024 Oct 16;13:RP97896. doi: 10.7554/eLife.97896 (PMC11483130; doi:10.7554/eLife.97896)
Supplement: Figure 5—source data 2. [file elife-97896-fig5-data2.xlsx]

## Sheet: Fig. 5A
	Normalized ratio (Slp1/Cdc2)
		Repeat #1	Repeat #2	Repeat #3	Mean	SD	P value (vs wild type)		P value (pek1-DD vs apc15Δ pek1-DD)		P value (apc15Δ vs apc15Δ pek1-DD )
	nda3-KM311	1	1	1	1	0
	nda3-KM311 apc15 Δ	1.40032	1.35683	1.28162	1.34626	0.06005	0.0006	***
	nda3-KM311 Z::Padh11-pek1(DD)	0.50881	0.576829	0.481217	0.522285	0.04921	<0.0001	****
	nda3-KM311 apc15 Δ Z::Padh11-pek1(DD)	1.08779	1.19054	1.24896	1.17576	0.0816	0.0203	*	0.0003	***	0.0435	*

## Sheet: Fig. 5B
	Cells with Cdc13-GFP on SPBs (%)
	Strain	timepoint (min)
	nda3-KM311	0	10	20	30	40	50
	Repeat #1	85.4545	79.8206	57.0136	41.0377	27.7551	23.2877
	Repeat #2	95.8904	92.3423	56.3786	38.0623	31.6239	18.9427
	Repeat #3	84.0637	82.1596	51.282	41.1483	27.668	17.4672
	Mean value	88.4696	84.7742	54.8914	40.0828	29.0157	19.8992
	Standard deviation (SD)	6.466	6.657	3.142	1.753	2.255	3.026
	Strain	timepoint (min)
	nda3-KM311 apc15Δ	0	10	20	30	40	50
	Repeat #1	67.5325	59.5833	42.1739	34.1346	25.9109	19.6172
	Repeat #2	68.3258	55.1948	49.0842	35.6846	23.7548	21.875
	Repeat #3	69.869	67.4242	48.9511	49.2	30.6273	25.8333
	Mean value	68.5758	60.7341	46.7364	39.6731	26.7643	22.4419
	Standard deviation (SD)	1.189	6.196	3.952	8.29	3.518	3.143
	Strain	timepoint (min)
	nda3-KM311 lys1::Padh11-pek1(DD)	0	10	20	30	40	50
	Repeat #1	83.8174	82.7004	71.2389	58.1897	46.3415	39.2857
	Repeat #2	87.1486	84.5865	66.7808	62.0209	45.5814	30.4348
	Repeat #3	86.7299	83.0357	67.1756	53.9034	45.0217	42.2594
	Mean value	85.8986	83.4409	68.3984	58.038	45.6482	37.3266
	Standard deviation (SD)	1.814	1.007	2.468	4.062	0.6625	6.155
	Strain	timepoint (min)
	nda3-KM311 apc15Δ lys1::Padh11-pek1(DD)	0	10	20	30	40	50
	Repeat #1	65.371	55.6604	45.4167	34	22.3809	17.1875
	Repeat #2	63.8298	60.5469	50.1961	45.7143	27.3469	20
	Repeat #3	67.0588	65.1163	54.0284	47.7273	28.5714	22.1607
	Mean value	65.4199	60.4412	49.8804	42.4805	26.0998	19.7827
	Standard deviation (SD)	1.616	4.731	4.314	7.413	3.279	2.492

## Sheet: Fig. 5C
			Raw measurement ratio (Slp1/Cdc2)				Normalized ratio (Slp1/Cdc2)			Mean	SD	p values (vs WT)		p values (vs pek1DD)
			Repeat #1	Repeat #2	Repeat #3		Repeat #1	Repeat #2	Repeat #3
		nda3-KM311 lys1Δ::Pslp1-slp1(WT)	0.372093	0.290631	0.304257	nda3-KM311 lys1Δ::Pslp1-slp1(WT)	1	1	1	1	0
		nda3-KM311 lys1Δ::Padh11-pek1(DD)	0.274772	0.210391	0.239643	nda3-KM311 lys1Δ::Padh11-pek1(DD)	0.73845	0.723912	0.787634	0.749999	0.03339	0.0002	***
		nda3-KM311 lys1Δ::Pslp1-slp1(K472R)	0.690294	0.413103	0.439384	nda3-KM311 lys1Δ::Pslp1-slp1(K472R)	1.85516	1.4214	1.44412	1.57356	0.2441	0.0152	*
		nda3-KM311 lys1Δ::Pslp1-slp1(K472R) Z::Padh11-pek1(DD)	0.546848	0.360084	0.361379	nda3-KM311 lys1Δ::Pslp1-slp1(K472R) Z::Padh11-pek1(DD)	1.46965	1.23897	1.18774	1.29879	0.1502	0.0261	*	0.0035	**
		nda3-KM311 lys1Δ::Pslp1-slp1(K479R)	0.813173	0.681646	0.492405	nda3-KM311 lys1Δ::Pslp1-slp1(K479R)	2.1854	2.3454	1.61839	2.04973	0.382	0.0089	**
		nda3-KM311 lys1Δ::Pslp1-slp1(K479R) Z::Padh11-pek1(DD)	0.797247	0.526146	0.469335	nda3-KM311 lys1Δ::Pslp1-slp1(K479R) Z::Padh11-pek1(DD)	2.1426	1.81036	1.54256	1.83184	0.3006	0.0087	**	0.0035	**
		nda3-KM311 lys1Δ::Pslp1-slp1(K472R,K479R)	0.851828	0.719066	0.60625	nda3-KM311 lys1Δ::Pslp1-slp1(K472R,K479R)	2.28929	2.47415	1.99256	2.252	0.243	0.0009	***
		nda3-KM311 lys1Δ::Pslp1-slp1(K472R,K479R) Z::Padh11-pek1(DD)	0.784973	0.635901	0.500318	nda3-KM311 lys1Δ::Pslp1-slp1(K472R,K479R) Z::Padh11-pek1(DD)	2.10961	2.188	1.64439	1.98067	0.2938	0.0044	**	0.002	**
		nda3-KM311 pmk1Δ Z::Padh11-pek1(DD)	0.562108	0.409241	0.422807	nda3-KM311 pmk1Δ Z::Padh11-pek1(DD)	1.51066	1.40811	1.38964	1.43614	0.0652	0.0003	***	﹤0.0001	****

## Sheet: Fig. 5D
	Cells with Cdc13-GFP on SPBs (%)
	Strain	timepoint (min)
	nda3-KM311 slp1Δ lys1Δ::Pslp1-slp1(WT)	0	10	20	30	40	50
	Repeat #1	87.47	73.93	64.86	46.16	26.11	12.33
	Repeat #2	74.76	66.34	45.69	34.19	21.1	13.04
	Repeat #3	87.5	73	55.66	46.24	32.18	22.88
	Repeat #4	88.39	78.54	49.8	41.15	31.68	21.97
	Repeat #5	82.35	66.74	45.79	37.39	30.18	20.66
	Repeat #6	79.16	67.56	43	34.13	26.36	23.15
	Mean value	83.2717	71.0183	50.8	39.8767	27.935	19.005
	Standard deviation (SD)	5.51191	4.92202	8.17747	5.53425	4.23352	4.97722
	Strain	timepoint (min)
	nda3-KM311 slp1Δ lys1Δ::Pslp1-slp1(K472R)	0	10	20	30	40	50
	Repeat #1	79.51	65.43	51.86	30.67	25.88	18.5
	Repeat #2	66.78	58.68	47.31	28.01	21.76	13.48
	Repeat #3	77	66.86	42.73	39.24	25.82	13.9
	Mean value	74.43	63.6567	47.3	32.64	24.4867	15.2933
	Standard deviation (SD)	6.74291	4.36883	4.56501	5.86847	2.36155	2.78498
	Strain	timepoint (min)
	nda3-KM311 slp1Δ lys1Δ::Pslp1-slp1(K479R)	0	10	20	30	40	50
	Repeat #1	73.43	62.39	39.9	32.82	26.47	19.31
	Repeat #2	73.16	60.5	44.96	30.83	20.49	11.21
	Repeat #3	60.3	52.3	43.31	23.65	15.11	11.89
	Repeat #4	76.31	54.32	39.68	24.5	17.93	10.89
	Repeat #5	76.17	53.06	39.31	30.19	25	12.15
	Mean value	68.9633	58.3967	42.7233	29.1	20.69	14.1367
	Standard deviation (SD)	6.63638	4.60752	2.54426	4.07486	4.75126	3.51377
	Strain	timepoint (min)
	nda3-KM311 slp1Δ lys1Δ::Pslp1-slp1(K472R, K479R)	0	10	20	30	40	50
	Repeat #1	52.97	45.78	32.1	21.51	17.66	15.71
	Repeat #2	69	58	39	30	23	18
	Repeat #3	66.67	54.68	41.59	30.59	16.34	14.88
	Mean value	62.88	52.82	37.5633	27.3667	19	16.1967
	Standard deviation (SD)	8.66102	6.31877	4.90541	5.08059	3.52641	1.61593
	Strain	timepoint (min)
	nda3-KM311 slp1Δ lys1Δ::Pslp1-slp1 pmk1Δ	0	10	20	30	40	50
	Repeat #1	58.61	49.51	34.21	27.93	20.89	16.98
	Repeat #2	66	58.17	43.28	35.12	23.73	20
	Repeat #3	71.98	55.09	35.22	24.7	19.44	15.05
	Mean value	65.53	54.2567	37.57	29.25	21.3533	17.3433
	Standard deviation (SD)	6.69738	4.38973	4.97072	5.33394	2.18221	2.49492
	Strain #11158	timepoint (min)
	nda3-KM311 slp1Δ lys1∆::Pslp1-slp1(WT) Z::Padh11-pek1(DD)	0	10	20	30	40	50
	Repeat #1	82.08	71.49	59.35	54.55	45.15	38.12
	Repeat #2	79.2	68.46	59.52	50	43.96	36.82
	Repeat #3	86.21	70.56	59.31	48.95	34.5	30.7
	Mean value	82.4967	70.17	59.3933	51.1667	41.2033	35.2133
	Standard deviation (SD)	3.52353	1.55219	0.111505	2.97672	5.83567	3.96234
	Strain #11230	timepoint (min)
	nda3-KM311 slp1Δ lys1∆::Pslp1-slp1(K472R) Z::Padh11-pek1(DD)	0	10	20	30	40	50
	Repeat #1	78.3	59.57	50	47.86	34.84	27.47
	Repeat #2	71.81	62.61	46.64	40.6	31.25	18.75
	Repeat #3	82.1	73.77	42.99	31.46	23.96	19.18
	Mean value	77.4033	65.3167	46.5433	39.9733	30.0167	21.8
	Standard deviation (SD)	5.20327	7.47693	3.506	8.21794	5.54386	4.91507
	Strain #11177	timepoint (min)
	nda3-KM311 slp1Δ lys1∆::Pslp1-slp1(K479R) Z::Padh11-pek1(DD)	0	10	20	30	40	50
	Repeat #1	69.45	61.91	46.21	40.28	31.78	26.2
	Repeat #2	75.75	68.56	42.03	38.46	25.5	20.19
	Repeat #3	64	56.8	41.59	30.62	27.57	18.75
	Mean value	69.7333	62.4233	43.2767	36.4533	28.2833	21.7133
	Standard deviation (SD)	5.88012	5.89678	2.54985	5.13312	3.20019	3.95171
