# Supplementary material for: Negative regulation of APC/C activation by MAPK-mediated attenuation of Cdc20Slp1 under stress
Source: eLife. 2024 Oct 16;13:RP97896. doi: 10.7554/eLife.97896 (PMC11483130; doi:10.7554/eLife.97896)
Supplement: Figure 6—figure supplement 2—source data 1. [file elife-97896-fig6-figsupp2-data1.xlsx]

## Sheet: Figure 1-figure supplement 3B
	Induction of overexpression of Mad2 for 18 hr
	Strain
	Pnmt1-mad2+	number of cells with short spindles	number of other cell type	% short spindle/metaphase arrest
	Repeat #1	199	235	84.6809
	Repeat #2	152	185	82.1622
	Repeat #3	133	155	85.8065
	Mean value			84.2165
	Standard deviation (SD)			1.866
	Strain
	Pnmt1-mad2+ pmk1Δ	number of cells with short spindles	number of other cell type	% short spindle/metaphase arrest
	Repeat #1	263	375	70.1333
	Repeat #2	137	213	64.3192
	Repeat #3	141	207	68.1159
	Mean value			67.5228
	Standard deviation (SD)			2.952
	p value vs Pnmt1-mad2+ strain			0.0012
	Strain
	Pnmt1-mad2+ sty1T97A	number of cells with short spindles	number of other cell type	% short spindle/metaphase arrest
	Repeat #1	144	232	62.069
	Repeat #2	240	338	71.0059
	Repeat #3	186	272	68.3824
	Mean value			67.1524
	Standard deviation (SD)			4.594
	p value vs Pnmt1-mad2+ strain			0.004
	Strain
	Pnmt1-mad2+ spk1Δ	number of cells with short spindles	number of other cell type	% short spindle/metaphase arrest
	Repeat #1	187	229	81.6594
	Repeat #2	172	199	86.4322
	Repeat #3	200	234	85.4701
	Mean value			84.5205
	Standard deviation (SD)			2.524
	p value vs Pnmt1-mad2+ strain			0.8749

## Sheet: Figure 2-figure supplement 1C
		Counted bi-nucleate cells (%)
		Strain	timepoint after release at 25°C (min)
		cdc25-22	0	15	30	45	60	75	90	105	120	135	150	180	210
			0	0	0	0	17.3913	46.5116	74.0933	64.375	42.2222	26.9036	16.3043	7.40741	4.08163
		Strain	timepoint after release at 25°C (min)
		cdc25-22 pmk1Δ	0	15	30	45	60	75	90	105	120	135	150	180	210
			0	0	0	0	12.6984	30	61.9835	76.4103	62.0915	40.5882	20.9302	8.82353	6.54762
		Strain	timepoint after release at 25°C (min)
		cdc25-22 Padh11-pek1(DD)	0	15	30	45	60	75	90	105	120	135	150	180	210
			0	0	0	0	2	9.72973	33.1429	60.8696	69.2683	53.1579	30.9091	9.63855	3.80435

## Sheet: Figure 3-figure supplement 3
	Cells with Cdc13-GFP on SPBs (%)
	Strain	timepoint after release at 30°C (min)
	nda3-KM311 slp1Δ lys1Δ::Pslp1-slp1(WT)	0	50
	Repeat #1	84.5	18.31
	Repeat #2	86.38	16.3
	Repeat #3	89.5	16.59
	Mean value	86.7933	17.0667
	Standard deviation (SD)	2.525	1.086
	Strain	timepoint after release at 30°C (min)
	nda3-KM311 slp1Δ lys1Δ::Pslp1-slp1(K19A,K20A,R21A,K47A,R48A)	0	50
	Repeat #1	75.88	24.13
	Repeat #2	62	19.63
	Repeat #3	68.8	14.29
	Mean value	68.8933	19.35
	Standard deviation (SD)	6.94	4.926
	p value vs WT strain (nda3-KM311)	0.0137	0.4769
	Strain	timepoint after release at 30°C (min)
	nda3-KM311 slp1Δ lys1Δ::Pslp1-slp1(PDSP-K19A,K20A,R21A,K47A,R48A)	0	50
	Repeat #1	83.58	14.93
	Repeat #2	79.55	27.53
	Repeat #3	74.88	22.99
	Mean value	79.3367	21.8167
	Standard deviation (SD)	4.354	6.381
	p value vs WT strain (nda3-KM311)	0.0622	0.2726
	Strain	timepoint after release at 30°C (min)
	nda3-KM311 slp1Δ lys1Δ::Pslp1-slp1(PDSP-K19A,K20A,R21A,K47A,R48A) pmk1Δ	0	50
	Repeat #1	56.32	19.5
	Repeat #2	62.31	28.29
	Repeat #3	73.72	12.81
	Mean value	64.1167	20.2
	Standard deviation (SD)	8.84	7.764
	p value vs WT strain (nda3-KM311)	0.0129	0.5268
	Strain	timepoint after release at 30°C (min)
	nda3-KM311 slp1Δ lys1Δ::Pslp1-slp1(WT) Z::Padh11-pek1(DD)	0	50
	Repeat #1	83.95	39.09
	Repeat #2	88.85	30.78
	Repeat #3	80.98	42.41
	Mean value	84.5933	37.4267
	Standard deviation (SD)	3.974	5.991
	Strain	timepoint after release at 30°C (min)
	nda3-KM311 slp1Δ lys1Δ::Pslp1-slp1(K19A,K20A,R21A,K47A,R48A) Z::Padh11-pek1(DD)	0	50
	Repeat #1	70.1	22.4
	Repeat #2	75.73	27.25
	Repeat #3	65.25	16.35
	Mean value	70.36	22
	Standard deviation (SD)	5.245	5.461
	p value vs WT pek1(DD) strain (nda3-KM311)	0.02	0.03
	Strain	timepoint after release at 30°C (min)
	nda3-KM311 slp1Δ lys1Δ::Pslp1-slp1(WT) Z::Padh11-pek1(DD) pmk1Δ	0	50
	Repeat #1	56.09	23.1
	Repeat #2	75.25	21.25
	Repeat #3	68.33	15.35
	Mean value	66.5567	19.9
	Standard deviation (SD)	9.702	4.048
	p value vs WT pek1(DD) strain (nda3-KM311)	0.0408	0.0137

## Sheet: Figure 6-figure supplement 2
	Cells with Cdc13-GFP on SPBs (%)					Time course analyses after 0.6M KCl treatment for 1 hr					Time course analyses after 2μg/mL Caspofungin treatment for 1 hr
	Strain	timepoint after release at 30C (min)				Strain	timepoint after release at 30C (min)				Strain	timepoint after release at 30C (min)
	nda3-KM311 (untreated control)	0	50			nda3-KM311 slp1Δ lys1Δ::Pslp1-slp1+	0	50			nda3-KM311 slp1Δ lys1Δ::Pslp1-slp1+	0	50
	Repeat #1	92.8276	10.3306			Repeat #1	0.895067	0.446903			Repeat #1	0.863367	0.361232
	Repeat #2	91.671	18.1452			Repeat #2	0.891304	0.483333			Repeat #2	0.791818	0.462995
	Repeat #3	87.0909	10.396			Repeat #3	0.793148	0.449219			Repeat #3	0.875	0.357374
	Mean value	90.5298	12.9573			Mean value	0.85984	0.459818			Mean value	0.843395	0.393867
	Standard deviation (SD)	2.92344	3.6685			Standard deviation (SD)	5.782	2.038			Standard deviation (SD)	4.506	5.99
	Strain	timepoint after release at 30C (min)				Strain	timepoint after release at 30C (min)				Strain	timepoint after release at 30C (min)
	nda3-KM311 (treated with 0.6M KCl for 1 hr before release to 30C)	0	50			nda3-KM311 slp1Δ lys1Δ::Pslp1-slp1(T480A)	0	50			nda3-KM311 slp1Δ lys1Δ::Pslp1-slp1(T480A)	0	50
	Repeat #1	91.7729	51.7949			Repeat #1	0.708696	0.28			Repeat #1	0.706729	0.245968
	Repeat #2	90.5	40.1914			Repeat #2	0.67913	0.366812			Repeat #2	0.691362	0.297425
	Repeat #3	87.3418	45.8015			Repeat #3	0.7624	0.4185			Repeat #3	0.800846	0.307843
	Mean value	89.8716	45.9293			Mean value	0.716742	0.355104			Mean value	0.732979	0.283745
	Standard deviation (SD)	1.45196	4.73796			Standard deviation (SD)	4.223	6.999			Standard deviation (SD)	5.924	3.309
	p value vs WT strain (nda3-KM311 (untreated control))	0.7789	0.0015			p value vs WT strain (nda3-KM311 slp1Δ lys1Δ::Pslp1-slp1+)	0.0258	0.0676			p value vs WT strain (nda3-KM311 slp1Δ lys1Δ::Pslp1-slp1+)	0.0621	0.0495
	Strain	timepoint after release at 30C (min)				Strain	timepoint after release at 30C (min)				Strain	timepoint after release at 30C (min)
	nda3-KM311 pmk1Δ (treated with 0.6M KCl for 1 hr before release to 30C)	0	50			nda3-KM311 slp1Δ lys1Δ::Pslp1-slp1(S76A,T480A)	0	50			nda3-KM311 slp1Δ lys1Δ::Pslp1-slp1(S76A,T480A)	0	50
	Repeat #1	74	29.2683			Repeat #1	0.662037	0.336364			Repeat #1	0.615217	0.283951
	Repeat #2	69.3333	35.3211			Repeat #2	0.629865	0.408789			Repeat #2	0.655399	0.236364
	Repeat #3	60.0858	37.037			Repeat #3	0.7072	0.2522			Repeat #3	0.6288	0.2666
	Mean value	67.8064	33.8755			Mean value	0.666368	0.332451			Mean value	0.633139	0.262305
	Standard deviation (SD)	5.78214	3.33224			Standard deviation (SD)	3.883	7.837			Standard deviation (SD)	2.045	2.409
	p value vs WT strain (nda3-KM311 (untreated control))	0.0069	0.004			p value vs WT strain (nda3-KM311 slp1Δ lys1Δ::Pslp1-slp1+)	0.0086	0.0528			p value vs WT strain (nda3-KM311 slp1Δ lys1Δ::Pslp1-slp1+)	0.0018	0.0242
	Strain	timepoint after release at 30°C (min)				Strain	timepoint after release at 30°C (min)				Strain	timepoint after release at 30°C (min)
	nda3-KM311 (treated with 2μg/mL Caspofungin for 1 hr before release to 30C)	0	50			nda3-KM311 slp1Δ lys1Δ::Pslp1-slp1(K19A,K20A,R21A,K47A,R48A)	0	50			nda3-KM311 slp1Δ lys1Δ::Pslp1-slp1(K19A,K20A,R21A,K47A,R48A)	0	50
	Repeat #1	89.6364	42.3391			Repeat #1	0.641814	0.360825			Repeat #1	0.655649	0.209184
	Repeat #2	79.2586	37.3057			Repeat #2	0.7065	0.3475			Repeat #2	0.7025	0.3024
	Repeat #3	93.6364	40.9283			Repeat #3	0.7092	0.2466			Repeat #3	0.6033	0.2455
	Mean value	87.5104	40.191			Mean value	0.685838	0.318308			Mean value	0.653816	0.252361
	Standard deviation (SD)	5.68011	1.69989			Standard deviation (SD)	3.816	6.245			Standard deviation (SD)	4.962	4.698
	p value vs WT strain (nda3-KM311 (untreated control))	0.5498	0.0008			p value vs WT strain (nda3-KM311 slp1Δ lys1Δ::Pslp1-slp1+)	0.0122	0.0203			p value vs WT strain (nda3-KM311 slp1Δ lys1Δ::Pslp1-slp1+)	0.008	0.0323
	Strain	timepoint after release at 30°C (min)				Strain	timepoint after release at 30°C (min)				Strain	timepoint after release at 30°C (min)
	nda3-KM311 pmk1Δ (treated with 2μg/mL Caspofungin for 1 hr before release to 30C)	0	50			nda3-KM311 slp1Δ lys1Δ::Pslp1-slp1+ pmk1Δ	0	50			nda3-KM311 slp1Δ lys1Δ::Pslp1-slp1+ pmk1Δ	0	50
	Repeat #1	59.292	32.8704			Repeat #1	0.591063	0.372449			Repeat #1	0.621463	0.239298
	Repeat #2	63.0901	28.531			Repeat #2	0.7225	0.3522			Repeat #2	0.5325	0.19125
	Repeat #3	52.5862	31.0753			Repeat #3	0.6357	0.3375			Repeat #3	0.6036	0.2933
	Mean value	58.3228	30.8256			Mean value	0.649754	0.35405			Mean value	0.585854	0.241283
	Standard deviation (SD)	4.34263	3.15315			Standard deviation (SD)	6.682	1.752			Standard deviation (SD)	4.708	5.103
	p value vs WT strain (nda3-KM311 (untreated control))	0.0008	0.0034			p value vs WT strain (nda3-KM311 slp1Δ lys1Δ::Pslp1-slp1+)	0.0146	0.0024			p value vs WT strain (nda3-KM311 slp1Δ lys1Δ::Pslp1-slp1+)	0.0024	0.0284
