# Supplementary material for: Negative regulation of APC/C activation by MAPK-mediated attenuation of Cdc20Slp1 under stress
Source: eLife. 2024 Oct 16;13:RP97896. doi: 10.7554/eLife.97896 (PMC11483130; doi:10.7554/eLife.97896)
Supplement: Figure 6—figure supplement 3—source data 2. [file elife-97896-fig6-figsupp3-data2.xlsx]

## Sheet: Figure 6-figure supplement 3
	Group #1: KCl treatment
		Raw measurement ratio (Slp1/Cdc2)				Normalized ratio (Slp1/Cdc2)			Mean	SD	p values (vs nda3-KM311 (18°C))
		Repeat #1	Repeat #2	Repeat #3		Repeat #1	Repeat #2	Repeat #3
	nda3-KM311 (30°C)	0.201385	0.267735	0.13802	nda3-KM311 (30°C)	0.333675	0.275707	0.323645	0.311009	0.03098	0.0001	****
	nda3-KM311 (30°C)	0.603537	0.971083	0.426455	nda3-KM311 (18°C)	1	1	1	1	0
	nda3-KM311 slp1(WT)+0.6M KCl	0.30567	0.651581	0.199494	nda3-KM311 slp1(WT)+0.6M KCl	0.506465	0.670984	0.467795	0.548415	0.1079	0.0019	**
	nda3-KM311 slp1(T480A)+0.6M KCl	0.657993	0.982725	0.317529	nda3-KM311 slp1(T480A)+0.6M KCl	1.09023	1.01199	0.744578	0.948932	0.1812	0.6511	ns
	nda3-KM311 slp1(S76A,T480A)+0.6M KCl	0.708338	0.806178	0.311705	nda3-KM311 slp1(S76A,T480A)+0.6M KCl	1.17364	0.830185	0.730922	0.911583	0.2323	0.5458	ns
	nda3-KM311 slp1(K472R)+0.6M KCl	0.783928	0.828958	0.419761	nda3-KM311 slp1(K472R)+0.6M KCl	1.29889	0.853643	0.984302	1.04561	0.2289	0.7473	ns
	nda3-KM311 slp1(K479R)+0.6M KCl	0.727355	1.03181	0.498888	nda3-KM311 slp1(K479R)+0.6M KCl	1.20515	1.06254	1.16985	1.14585	0.07428	0.0273	*
	nda3-KM311 slp1(K472R,K479R)+0.6M KCl	0.913485	1.57428	0.70811	nda3-KM311 slp1(K472R,K479R)+0.6M KCl	1.51355	1.62116	1.66046	1.59839	0.07605	0.0002	***
	nda3-KM311 pmk1Δ+0.6M KCl	0.544776	0.928894	0.429203	nda3-KM311 pmk1Δ+0.6M KCl	0.902639	0.956555	1.00644	0.955212	0.05192	0.2678	ns
	Group #2: Caspofungin treatment
		Raw measurement ratio (Slp1/Cdc2)				Normalized ratio (Slp1/Cdc2)			Mean	SD	p values (vs nda3-KM311 (18°C))
		Repeat #1	Repeat #2	Repeat #3		Repeat #1	Repeat #2	Repeat #3
	nda3-KM311 (30°C)	0.141824	0.358002	0.22697	nda3-KM311 (30°C)	0.256121	0.432233	0.30851	0.332288	0.09043	0.0002	***
	nda3-KM311 (30°C)	0.553739	0.828262	0.735697	nda3-KM311 (18°C)	1	1	1	1	0
	nda3-KM311 slp1(WT)+2 μg/mL Caspofungin	0.310014	0.384156	0.383971	nda3-KM311 slp1(WT)+1 μg/mL Caspofungin	0.559856	0.46381	0.521914	0.515193	0.04837	0.0001	****
	nda3-KM311 slp1(T480A)+2 μg/mL Caspofungin	0.441225	0.611167	0.637472	nda3-KM311 slp1(T480A)+1 μg/mL Caspofungin	0.79681	0.737891	0.866488	0.800396	0.06437	0.0058	**
	nda3-KM311 slp1(S76A,T480A)+2 μg/mL Caspofungin	0.445061	0.614811	0.658776	nda3-KM311 slp1(S76A,T480A)+1 μg/mL Caspofungin	0.803737	0.742291	0.895445	0.813824	0.07707	0.0139	*
	nda3-KM311 slp1(K472R)+2 μg/mL Caspofungin	0.62711	0.878358	0.82876	nda3-KM311 slp1(K472R)+1 μg/mL Caspofungin	1.1325	1.06048	1.1265	1.10649	0.03996	0.0099	**
	nda3-KM311 slp1(K479R)+2 μg/mL Caspofungin	0.566842	0.830865	0.75997	nda3-KM311 slp1(K479R)+1 μg/mL Caspofungin	1.02366	1.00314	1.03299	1.01993	0.01527	0.0866	ns
	nda3-KM311 slp1(K472R,K479R)+2 μg/mL Caspofungin	0.849432	1.37858	1.14517	nda3-KM311 slp1(K472R,K479R)+1 μg/mL Caspofungin	1.53399	1.66443	1.55657	1.585	0.06971	0.0001	***
	nda3-KM311 pmk1Δ+2 μg/mL Caspofungin	0.565894	0.810369	0.647325	nda3-KM311 pmk1Δ+1 μg/mL Caspofungin	1.02195	0.978397	0.879881	0.960076	0.07278	0.3959	ns
