# Supplementary material for: Negative regulation of APC/C activation by MAPK-mediated attenuation of Cdc20Slp1 under stress
Source: eLife. 2024 Oct 16;13:RP97896. doi: 10.7554/eLife.97896 (PMC11483130; doi:10.7554/eLife.97896)
Supplement: Figure 6—source data 2. [file elife-97896-fig6-data2.xlsx]

## Sheet: Fig. 6D
	Cells with Cdc13-GFP on SPBs (%)
	Strain	timepoint (min)
	nda3-KM311 (untreated control)	0	10	20	30	40	50
	Repeat #1	92.8276	90.5378	62.5064	47.0588	19.457	10.3306
	Repeat #2	91.671	90.1053	76.8889	36.7965	24.1706	18.1452
	Repeat #3	87.0909	83.8491	66.9856	27.5424	22.488	10.396
	Mean value	90.5298	88.164	68.7937	37.1326	22.0386	12.9573
	Standard deviation (SD)	2.92344	3.65987	9.15775	7.9711	1.95039	3.6685
	Strain	timepoint (min)
	nda3-KM311 (treated with 0.6M KCl for 1 hr before release to 30C)	0	10	20	30	40	50
	Repeat #1	91.7729	87.7391	73.3333	56.1475	53.1646	51.7949
	Repeat #2	90.5	84.1852	77.8302	72.5	52.2727	40.1914
	Repeat #3	87.3418	79.1653	70.4846	64.1509	54.9763	45.8015
	Mean value	89.8716	83.6965	73.8827	64.2662	53.4712	45.9293
	Standard deviation (SD)	1.45196	2.09634	3.02389	6.67636	1.12483	4.73796
	Strain	timepoint (min)
	nda3-KM311 pmk1Δ (treated with 0.6M KCl for 1 hr before release to 30C)	0	10	20	30	40	50
	Repeat #1	74	57.1984	48.8789	42.6396	36.2445	29.2683
	Repeat #2	69.3333	60.3687	51.4706	50.4167	40.2597	35.3211
	Repeat #3	60.0858	57.5472	53.2468	41.0042	37.6068	37.037
	Mean value	67.8064	58.3714	51.1988	44.6868	38.037	33.8755
	Standard deviation (SD)	5.78214	1.41942	1.79349	4.10626	1.66719	3.33224
	Strain	timepoint (min)
	nda3-KM311 (treated with 2μg/mL Caspofungin for 1 hr before release to 30C)	0	10	20	30	40	50
	Repeat #1	89.6364	89.7101	65.445	69.2386	50.3509	42.3391
	Repeat #2	79.2586	87.7419	64.5263	55.4523	49.283	37.3057
	Repeat #3	93.6364	91.6056	77.3575	55.3846	44.3151	40.9283
	Mean value	87.5104	89.6859	69.1096	60.0252	47.983	40.191
	Standard deviation (SD)	5.68011	5.67427	2.87743	2.5416	3.66576	1.69989
	Strain	timepoint (min)
	nda3-KM311 pmk1Δ (treated with 2μg/mL Caspofungin for 1 hr before release to 30C)	0	10	20	30	40	50
	Repeat #1	59.292	51.4644	40.4145	44.3515	37.1212	32.8704
	Repeat #2	63.0901	60.0985	41.6268	35.3774	32.5649	28.531
	Repeat #3	52.5862	57.4074	47.3934	40	40.5941	31.0753
	Mean value	58.3228	56.3235	43.1449	39.9096	36.76	30.8256
	Standard deviation (SD)	4.34263	3.60722	3.04462	3.66422	2.10227	3.15315

## Sheet: Fig. 6E
	Time course analyses after 0.6M KCl treatment for 1 hr
	Strain	timepoint (min)
	nda3-KM311 slp1Δ lys1Δ::Pslp1-slp1+	0	10	20	30	40	50
	Repeat #1	0.895067	0.765	0.690926	0.560094	0.476636	0.446903
	Repeat #2	0.891304	0.809375	0.738713	0.557692	0.512077	0.483333
	Repeat #3	0.793148	0.727561	0.625122	0.542986	0.480769	0.449219
	Mean value	0.85984	0.767312	0.68492	0.553591	0.489827	0.459818
	Standard deviation (SD)	5.782	4.095	5.704	0.9258	1.94	2.038
	Strain	timepoint (min)
	nda3-KM311 slp1Δ lys1Δ::Pslp1-slp1+ pmk1Δ	0	10	20	30	40	50
	Repeat #1	0.591063	0.406863	0.406699	0.372385	0.361233	0.372449
	Repeat #2	0.7225	0.6366	0.5588	0.4369	0.3896	0.3522
	Repeat #3	0.6357	0.6075	0.5233	0.4624	0.3944	0.3375
	Mean value	0.649754	0.550321	0.496266	0.423895	0.381744	0.35405
	Standard deviation (SD)	6.682	12.51	7.957	4.639	1.794	1.752
	Strain	timepoint (min)
	nda3-KM311 slp1Δ lys1Δ::Pslp1-slp1(T480A)	0	10	20	30	40	50
	Repeat #1	0.708696	0.593644	0.499036	0.380458	0.334635	0.28
	Repeat #2	0.67913	0.530928	0.541126	0.479753	0.39632	0.366812
	Repeat #3	0.7624	0.6522	0.5678	0.50125	0.4488	0.4185
	Mean value	0.716742	0.592257	0.535987	0.45382	0.393252	0.355104
	Standard deviation (SD)	4.223	6.066	3.469	6.444	5.716	6.999
	Strain	timepoint (min)
	nda3-KM311 slp1Δ lys1Δ::Pslp1-slp1(S76A,T480A)	0	10	20	30	40	50
	Repeat #1	0.662037	0.581818	0.409091	0.384259	0.353712	0.336364
	Repeat #2	0.629865	0.542169	0.521404	0.508	0.488966	0.408789
	Repeat #3	0.7072	0.6396	0.5675	0.4236	0.3649	0.2522
	Mean value	0.666368	0.587862	0.499331	0.43862	0.402526	0.332451
	Standard deviation (SD)	3.883	4.898	8.147	6.321	7.509	7.837
	Strain	timepoint (min)
	nda3-KM311 slp1Δ lys1Δ::Pslp1-slp1(K19A,K20A,R21A,K47A,R48A)	0	10	20	30	40	50
	Repeat #1	0.641814	0.524257	0.510526	0.417778	0.400693	0.360825
	Repeat #2	0.7065	0.6633	0.5526	0.4785	0.4236	0.3475
	Repeat #3	0.7092	0.6039	0.5196	0.4087	0.3756	0.2466
	Mean value	0.685838	0.597152	0.527575	0.434993	0.399964	0.318308
	Standard deviation (SD)	3.816	6.974	2.215	3.795	2.401	6.245
	Time course analyses after 2μg/mL Caspofungin treatment for 1 hr
	Strain	timepoint (min)
	nda3-KM311 slp1Δ lys1Δ::Pslp1-slp1+	0	10	20	30	40	50
	Repeat #1	0.863367	0.821359	0.652174	0.549761	0.463208	0.361232
	Repeat #2	0.791818	0.673575	0.747414	0.657798	0.555769	0.462995
	Repeat #3	0.875	0.824404	0.694949	0.52132	0.403797	0.357374
	Mean value	0.843395	0.773113	0.698179	0.576293	0.474258	0.393867
	Standard deviation (SD)	4.506	8.621	4.768	7.201	7.66	5.99
	Strain	timepoint (min)
	nda3-KM311 slp1Δ lys1Δ::Pslp1-slp1+ pmk1Δ	0	10	20	30	40	50
	Repeat #1	0.621463	0.57093	0.491262	0.417195	0.31974	0.239298
	Repeat #2	0.5325	0.4866	0.4295	0.3751	0.2564	0.19125
	Repeat #3	0.6036	0.5265	0.4755	0.4087	0.3691	0.2933
	Mean value	0.585854	0.52801	0.465421	0.400332	0.31508	0.241283
	Standard deviation (SD)	4.708	4.217	3.211	2.226	5.649	5.103
	Strain	timepoint (min)
	nda3-KM311 slp1Δ lys1Δ::Pslp1-slp1(T480A)	0	10	20	30	40	50
	Repeat #1	0.706729	0.566512	0.48723	0.423488	0.345283	0.245968
	Repeat #2	0.691362	0.659751	0.567561	0.491606	0.39619	0.297425
	Repeat #3	0.800846	0.665	0.582587	0.491304	0.376052	0.307843
	Mean value	0.732979	0.630421	0.545793	0.4688	0.372508	0.283745
	Standard deviation (SD)	5.924	5.543	5.13	3.923	2.564	3.309
	Strain	timepoint (min)
	nda3-KM311 slp1Δ lys1Δ::Pslp1-slp1(S76A,T480A)	0	10	20	30	40	50
	Repeat #1	0.615217	0.552113	0.49948	0.361257	0.244898	0.283951
	Repeat #2	0.655399	0.538914	0.438327	0.426606	0.394737	0.236364
	Repeat #3	0.6288	0.5866	0.5238	0.4875	0.3733	0.2666
	Mean value	0.633139	0.559209	0.487202	0.425121	0.337645	0.262305
	Standard deviation (SD)	2.045	2.463	4.406	6.311	8.102	2.409
	Strain	timepoint (min)
	nda3-KM311 slp1Δ lys1Δ::Pslp1-slp1(K19A,K20A,R21A,K47A,R48A)	0	10	20	30	40	50
	Repeat #1	0.655649	0.558209	0.464249	0.395487	0.291675	0.209184
	Repeat #2	0.7025	0.6234	0.5325	0.4876	0.3932	0.3024
	Repeat #3	0.6033	0.5268	0.4878	0.4688	0.3658	0.2455
	Mean value	0.653816	0.56947	0.49485	0.450629	0.350225	0.252361
	Standard deviation (SD)	4.962	4.928	3.469	4.866	5.251	4.698
