# Supplementary material for: Negative regulation of APC/C activation by MAPK-mediated attenuation of Cdc20Slp1 under stress
Source: eLife. 2024 Oct 16;13:RP97896. doi: 10.7554/eLife.97896 (PMC11483130; doi:10.7554/eLife.97896)
Supplement: Figure 7—source data 1. [file elife-97896-fig7-data1.xlsx]

## Sheet: Fig. 7C
		(%) Anaphase cells with Mis-segregation					(%) Anaphase cells with Lagging chromosome					(%) Anaphase cells with Mis-segregation + Lagging chromosome								p values
		Repeat #1	Repeat #2	Repeat #3	Mean	SD	Repeat #1	Repeat #2	Repeat #3	Mean	SD	Repeat #1	Repeat #2	Repeat #3	total anaphase cell number analyzed	Mean	SD	p values (vs WT + DMSO)
	wild-type + DMSO	0	0	0	0	0	2	2.2	2.4	2.2	0.2	2	2.2	2.4	240	2.43333	0.2082
	pmk1Δ+ DMSO	0.3	0.3	0.4	0.333333	0.05774	2.7	2.9	2.8	2.8	0.1	3	3.2	3.2	233	3.13333	0.1155	0.007	**	pmk1Δ vs pmk1Δ+ 0.6M KCl	0.0001	****
	wild-type+ 0.6M KCl	1.3	1.3	1.5	1.36667	0.1155	3.7	3.6	3.4	3.56667	0.1528	5	4.9	4.9	229	4.93333	0.05774	0.0001	****	pmk1Δ vs pmk1Δ+ 2μg/mL Caspofungin	0.0001	****
	pmk1Δ+ 0.6M KCl	3.5	4	4.2	3.9	0.3606	13.2	14.5	14.3	14	0.7	16.7	18.5	18.5	228	17.9	1.039	0.0001	****	wild-type +0.6M KCl vs pmk1Δ +0.6M KCl	0.0001	****
	wild-type+ 2μg/mL Caspofungin	2	2.3	1.9	2.06667	0.2082	3.7	3.4	3.6	3.56667	0.1528	5.7	5.7	5.5	240	5.63333	0.1155	0.0001	****
	pmk1Δ+ 2μg/mL Caspofungin	6	6.8	6.6	6.46667	0.4163	21.7	23.4	23	22.7	0.8888	27.7	30.2	29.6	221	29.1667	1.305	0.0001	****	wild-type+ 2μg/mL Caspofungin vs pmk1Δ +2μg/mL Caspofungin	0.0001	****
